# 1 **ACE2 Pathway Regulates Thermogenesis and Energy**

## 2 **Metabolism**

3

4 Xi Cao<sup>1#</sup>, Tingting Shi<sup>1#</sup>, Chuanhai Zhang<sup>2#</sup>, Wanzhu Jin<sup>3</sup>, Lini Song<sup>1</sup>, Yichen  
5 Zhang<sup>1</sup>, Jingyi Liu<sup>1</sup>, Fangyuan Yang<sup>1</sup>, Charles N Rotimi<sup>4</sup>, Amin Xu<sup>5</sup> and Jinkui  
6 Yang<sup>1</sup>✉

7 <sup>1</sup> Beijing Diabetes Institute, Beijing Key Laboratory of Diabetes Research and  
8 Care, Beijing Tongren Hospital, Capital Medical University, Beijing 10730, China

9 <sup>2</sup> Beijing Advanced Innovation Center for Food Nutrition and Human Health,  
10 College of Food Science and Nutritional Engineering, China Agricultural  
11 University, Beijing, 100083, China

12 <sup>3</sup>Key Laboratory of Animal Ecology and Conservation Biology, Institute of Zoology,  
13 and State Key Laboratory of Brain and Cognitive Sciences, Institute of Biophysics,  
14 Chinese Academy of Sciences, Beijing, China

15 <sup>4</sup>Center for Research on Genomics and Global Health, National Human Genome  
16 Research Institute, National Institutes of Health, Bethesda, Maryland, USA

17 <sup>5</sup> State Key Laboratory of Pharmaceutical Biotechnology, Department of Medicine,  
18 University of Hong Kong, Hong Kong, China

19

20 # These authors contribute equally to this paper.

21

22 ✉Address correspondence and reprint requests to Professor JinKui Yang,  
23 Department of Endocrinology, Beijing Tongren Hospital, Capital Medical  
24 University, Beijing 100730, China

25 Tel: +86-10-58268445

26 Fax: +86-10-65288736

27 Cell: +86-13911167636

28 E-mail: [jkyang@ccmu.edu.cn](mailto:jkyang@ccmu.edu.cn)

29

## 1 **Abstract**

2 Identification of key regulators of energy homeostasis holds important therapeutic  
3 promise for metabolic disorders, such as obesity and diabetes. ACE2 cleaves  
4 angiotensin II (Ang II) to generate Ang-(1-7) which acts mainly through the Mas  
5 receptor. Here, we identify ACE2 pathway as a critical regulator in the  
6 maintenance of thermogenesis and energy expenditure. We found that ACE2 is  
7 highly expressed in brown adipose tissue (BAT) and that cold stimulation  
8 increases ACE2 and Ang-(1-7) levels in BAT and serum. ACE2 knockout mice  
9 (*ACE2<sup>-/-</sup>*), *Mas* knockout mice (*Mas<sup>-/-</sup>*), and the mice transplanted with brown  
10 adipose tissue from *Mas<sup>-/-</sup>* mice displayed impaired thermogenesis. In contrast,  
11 impaired thermogenesis of db/db obese diabetic mice and high-fat diet-induced  
12 obese mice were ameliorated by overexpression of ACE2 or continuous infusion  
13 of Ang-(1-7). Activation of ACE2 pathway was associated with improvement of  
14 metabolic parameters, including blood glucose, lipids and energy expenditure in  
15 multiple animal models. Consistently, ACE2 pathway remarkably enhanced the  
16 browning of white adipose tissue. Mechanistically, we showed that ACE2 pathway  
17 activated Akt/FoxO1 and PKA pathway, leading to induction of UCP1 and  
18 activation of mitochondrial function. Our data propose that adaptive  
19 thermogenesis requires regulation of ACE2 pathway and highlight novel  
20 therapeutic targets for the treatment of metabolic disorders.

21

22 **Key Words:** ACE2; Angiotensin-(1-7); obesity; diabetes; brown adipose tissue;  
23 thermogenesis

24

## 1 **Introduction**

2 Energy imbalance and the associated metabolic syndromes have become a  
3 worldwide public health problem. Thus, identifying factors that can stimulate  
4 energy expenditure is instrumental to the development of therapeutics to reduce  
5 obesity associated disorders that affect over 10% of the world population (Dong,  
6 Lin, Lim, Jin, & Lee, 2017). In the renin-angiotensin system (RAS),  
7 angiotensin-converting enzyme 2 (ACE2) cleaves angiotensin II (Ang II) to  
8 generate angiotensin-(1-7) (Ang-(1-7)). Ang-(1-7) is a heptapeptide hormone  
9 which acts mainly through G-protein-coupled receptor Mas (Santos et al., 2003).  
10 ACE2-Ang-(1-7)-Mas pathway works as a negative regulator of ACE-Ang II  
11 pathway in multiple disease states (Clarke & Turner, 2012).

12 In this study we reported the effects of ACE2 pathway on regulating  
13 thermogenesis and energy metabolism via modulating mitochondrial function. We  
14 found that ACE2 knockout ( $ACE2^{-/-}$ ) and Mas knockout ( $Mas^{-/-}$ ) mice are cold  
15 intolerance. We provided compelling genetic, metabolic, physiological,  
16 histological, cellular, and molecular evidence to demonstrate that ACE2 pathway  
17 is a critical regulator in the maintenance of energy expenditure. This pathway  
18 regulates function of brown adipose tissue (BAT) and systemic energy  
19 metabolism. Mechanistically, ACE2 pathway activates both Akt/FoxO1 signaling  
20 and PKA signaling, leading to induction of uncoupling protein-1 (UCP1) and  
21 activation of mitochondrial function. Therefore, ACE2 pathway is a potential  
22 treatment target for metabolic disorders including diabetes, obesity, and even  
23 cardiovascular diseases.

24

## 25 **Results**

## 1 **Acute cold exposure increases components of ACE2 pathway**

2 The major tissue of the body where energy is converted into the form of heat to  
3 maintain the body temperature is BAT. We found both mRNA level and protein  
4 level of ACE2 and Mas in BAT were obviously higher than the ones in  
5 subcutaneous white adipose tissue (scWAT) and epididymal white adipose tissue  
6 (eWAT) in mice (**Figure 1A and B**). Acute cold exposure caused a significant  
7 up-regulation of ACE2 protein expression in BAT (**Figure 1C**). Meanwhile, ACE2  
8 mRNA levels in BAT, scWAT and eWAT, and Mas mRNA levels in BAT and  
9 eWAT also increased after exposed to 4°C for 48 hours (**Figure 1D and E**). ACE2  
10 and Ang-(1-7) were also marginally increased in serum upon cold challenge  
11 (**Figure 1F and G**). These results demonstrated a selective induction of ACE2  
12 pathway in thermogenic adipose depots (BAT and scWAT) and blood circulation  
13 in response to cold environment.

## 14 **ACE2 promotes thermogenesis and energy metabolism**

15 To explore the physiological roles of ACE2 in cold-induced adaptive  
16 thermogenesis, we used the HFD-induced *ACE2<sup>-/-</sup>* mice. ACE2 is essential for  
17 expression of neutral amino acid transporters in the gut in previous work  
18 (Hashimoto et al., 2012). This is consistent with our observation that *ACE2<sup>-/-</sup>* mice  
19 fed an HFD displayed significantly decreased weight compared to wild type (WT)  
20 mice (**Figure 2A**). Serum Ang-(1-7) levels were decreased in the *ACE2<sup>-/-</sup>* mice  
21 (**Figure 2B**). Consistent with previous studies (Cao, Yang, Xin, Xie, & Yang, 2014;  
22 C. Liu et al., 2012; Niu, Yang, Lin, Ji, & Guo, 2008; Shi et al., 2018; F. Zhang et al.,  
23 2016), *ACE2<sup>-/-</sup>* mice had an impaired glucose tolerance and abnormal lipid  
24 profiles (**Figure 2—figure supplement 1A-C**).

25 A key factor for controlling energy homeostasis is the balance between caloric  
26 intake and energy expenditure. Thus, we measured energy expenditure using a

1 comprehensive laboratory animal monitoring system (CLAMS). We observed a  
2 decreased oxygen consumption ( $VO_2$ ), carbon dioxide release ( $VCO_2$ ) and  
3 energy expenditure (EE) in  $ACE2^{-/y}$  mice (**Figure 2C, D and E**), without  
4 observable changes in food and/or water intake as well as physical activity,  
5 compared to the WT mice (**Figure 2—figure supplement 1D-F**).

6 To further examine the differences in energy expenditure among these animals,  
7 we performed a cold tolerance test in order to gauge adaptive thermogenesis.  
8  $ACE2^{-/y}$  mice had lower thermogenesis than the WT mice in a cold environment  
9 ( $4^{\circ}C$ ) (**Figure 2—figure supplement 1G**). To explore the source of  
10 thermogenesis, we analyzed the non-shivering thermogenesis (NST) of  $ACE2$  KO  
11 mice in thermoneutral condition ( $30^{\circ}C$ ), ambient temperature ( $22^{\circ}C$ ) and acute  
12 cold ( $4^{\circ}C$ ) for 8 hours.  $ACE2^{-/y}$  mice had lower thermogenesis than the WT mice  
13 in either  $22^{\circ}C$  or  $4^{\circ}C$  (**Figure 2F**). This temperature difference was monitored by  
14 an infrared camera (**Figure 2G**).

15 To investigate whether  $ACE2$  induced thermogenesis was related to BAT  
16 function, we performed the Positron emission tomography—computed tomography  
17 (PET-CT) analysis and the results showed a higher PET-CT signal in BAT of the  
18 HFD-induced WT mice than  $ACE2^{-/y}$  mice (**Figure 2H**). As expected, BAT in  
19  $ACE2^{-/y}$  mice displayed larger lipid droplets but reduced multilocular structures  
20 compared to the WT mice, and had reduced UCP1 expression (**Figure 2I**).

21 To evaluate the significance of cold-induced  $ACE2$  for thermogenic function of  
22 BAT, the expression levels of a network of genes and proteins controlling energy  
23 expenditure and thermogenic programming were measured. Protein levels (UCP1,  
24 PGC-1 $\alpha$  and ATP5A) (**Figure 2J**) and mRNA levels ( $UCP1$ ,  $PRMD16$  and  $PPAR\gamma$ )  
25 (**Figure 2—figure supplement 1H**) in BAT from  $ACE2^{-/y}$  were obviously  
26 decreased.

1 To validate the above-mentioned change of thermogenesis of BAT was cell  
2 autonomous, primary brown adipocytes from *ACE2<sup>-/-</sup>* mice was fractionated and  
3 differentiated *in vitro*. Notably, the protein and mRNA expression of known BAT  
4 markers were robustly decreased in *ACE2* deficient primary brown adipocytes  
5 (**Figure 2K, Figure 2—figure supplement 1I**). Immunohistochemistry was  
6 applied to study the level of UCP1 in primary brown adipocytes differentiated from  
7 the BAT of the *ACE2<sup>-/-</sup>* mice. The result showed the UCP1 expression was  
8 reduced in the *ACE2* deficiency primary brown adipocytes (**Figure 2L**). More  
9 importantly, the oxygen consumption rate (OCR) was significantly decreased in  
10 *ACE2* deficient primary brown adipocytes (**Figure 2M**).

11 As a complementary approach to the KO mouse models, we carried out  
12 gain-of-function studies using ACE2 over expression in obese diabetic db/db mice.  
13 One week following adenovirus induced ACE2 over-expression (Ad-ACE2) by tail  
14 vein injection in the db/db mice, both ACE2 (**Figure 3—figure supplement 2A**) in  
15 BAT and circulating Ang-(1-7) (**Figure 3A**) were increased. Consistent with our  
16 previous study, the Ad-ACE2-treated mice exhibited an improved metabolic  
17 profile as indicated by the significant alleviation of glucose intolerance (**Figure**  
18 **3—figure supplement 2B**). Notably, although no observable change on the body  
19 weight was observed in the two groups (**Figure 3B**), serum triglyceride levels  
20 decreased in the Ad-ACE2-treated mice (**Figure 3—figure supplement 2C**), as  
21 well as a minor change in serum cholesterol levels (**Figure 3—figure**  
22 **supplement 2D**).

23 Notably, the Ad-ACE2 treated db/db mice had increased energy expenditure  
24 ( $VO_2$ ,  $VCO_2$  and EE) (**Figure 3C-E**). There was no obvious change in food and/or  
25 water intake as well as physical activity (**Figure 3—figure supplement 2E-G**).

1 We measured rectal temperature and infrared thermal imaging in the db/db  
2 mice that BAT activity was defective as same as the ones in previous  
3 observations (Trayhurn & Wusteman, 1990; Z. Zhang et al., 2014). The results  
4 showed that the thermogenesis of the db/db mice was severely impaired (**Figure**  
5 **3—figure supplement 2H, I**). As expected, the Ad-ACE2 treated db/db mice  
6 exhibited better thermogenesis than the control mice in ambient temperature  
7 (22°C) and acute cold (4°C) conditions (**Figure 3F, G, Figure 3—figure**  
8 **supplement 2J**). Accordingly, PET-CT result showed that BAT was activated in  
9 the Ad-ACE2 treated db/db mice (**Figure 3H**). Moreover, BAT in the Ad-ACE2  
10 treated db/db mice had smaller lipid droplets but increased multi-locular structures,  
11 and had increased UCP1 expression compared with the control group (**Figure 3I**).

12 The protein levels of UCP1, ATP5A and UQCRC2 were significantly increased  
13 in the BAT from the Ad-ACE2 treated mice (**Figure 3J**). Consistently, the mRNA  
14 levels, including *UCP1*, *ATPsyn*, *COX8b*, *COX7a*, *AP2*, *CPT-1α*, *PRDM16*,  
15 *PGC-1α* and *PGC-1β*, were increased in the BAT from the Ad-ACE2 treated db/db  
16 mice (**Figure 3K**). Taken together, these results indicated that ACE2 effectively  
17 regulated the mitochondrial biogenesis and respiratory function in brown  
18 adipocytes.

### 19 **Ang-(1-7) promotes thermogenesis and energy metabolism**

20 To explore the direct physiological roles of Ang-(1-7) in cold-induced adaptive  
21 thermogenesis, Ang-(1-7) administration by subcutaneous implantation of  
22 micro-osmotic pumps in the db/db and the HFD-induced obese mice were  
23 employed. Serum Ang-(1-7) was increased in Ang-(1-7) treated mice (**Figure**  
24 **4—figure supplement 3A**). There are no significant differences in body weight  
25 between the Ang-(1-7) treated db/db mice and the db/db control mice (**Figure 4A**),  
26 however, Ang-(1-7) treated db/db mice has an improved glucose tolerance ability

1 (**Figure 4—figure supplement 3B**) and better lipid profiles (**Figure 4—figure**  
2 **supplement 3C, D**). The Ang-(1-7) treated HFD-induced obese mice displayed a  
3 lower body weight compared to the control (**Figure 4B**).

4 Notably, the Ang-(1-7) treated db/db mice had increased energy expenditure  
5 ( $VO_2$ ,  $VCO_2$  and EE) (**Figure 4C-E**) without any changes in food and/or water  
6 intake as well as physical activity (**Figure 4—figure supplement 3E-G**).  
7 Moreover, the Ang-(1-7) treated db/db and the HFD-induced obese mice were  
8 better able to defend their body temperature during environmental cold (22°C)  
9 and acute cold stress (4°C) compared to the control (**Figure 4F-H, Figure**  
10 **4—figure supplement 3H**). Meanwhile, the Ang-(1-7) treated db/db mice had  
11 increased multi-ocular structures but smaller lipid droplets, and increased UCP1  
12 expression comparing to the control group (**Figure 4I**). Accordingly, the Ang-(1-7)  
13 treated db/db and the HFD-induced obese mice showed more  $^{18}F$ -FDG uptake in  
14 the BAT than the control mice recorded by PET-CT (**Figure 4J, K**).

15 The protein levels of UCP1 and PGC-1 $\alpha$  were significantly induced in the BAT  
16 from the Ang-(1-7) treated db/db and the HFD-induced obese mice (**Figure 4L, M**).  
17 The mRNA levels, including *UCP1*, *PGC-1 $\alpha$* , *Cidea*, *ATPsyn*, *COX4*, *COX8b*,  
18 *COX7a*, *MCAD* and *AP2*, were increased in the BAT from the Ang-(1-7) treated  
19 db/db mice (**Figure 4—figure supplement 3I**).

20 To sum up, our results suggested that the enhanced thermogenesis effect in  
21 the Ad-ACE2 and Ang-(1-7) treated mice is caused by the increment of Ang-(1-7)  
22 levels, which demonstrates that Ang-(1-7) is crucial to the maintenance of  
23 thermogenesis.

#### 24 **Ablation of Mas impairs thermogenesis in brown adipose tissue**

25 Since the Ang-(1-7), produced by ACE2, realized the function through the Mas  
26 receptor, these results above prompted us to hypothesize that the Mas receptor



1 determines the effect of Ang-(1-7) in brown adipose tissue. Firstly, the  
2 HFD-induced *Mas*<sup>-/-</sup> mice (low Ang-(1-7) action model) were used to assess the  
3 therapeutic effects (interventional effects) of Mas on energy metabolism. Although  
4 serum Ang-(1-7) levels were increased, the *Mas*<sup>-/-</sup> mice had an impaired glucose  
5 tolerance, abnormal lipid profiles (**Figure 4—figure supplement 4A-D**), and  
6 significantly increased body weight compared to the WT mice (**Figure 4—figure  
7 supplement 4E**). Meanwhile, the *Mas*<sup>-/-</sup> mice exhibited decreased oxygen  
8 consumption (VO<sub>2</sub>) (**Figure 4—figure supplement 4F**) without any changes in  
9 food and/or water intake as well as physical activity (**Figure 4—figure  
10 supplement 4G-I**). Moreover, the *Mas*<sup>-/-</sup> mice had lower thermogenesis than the  
11 WT mice in either 22 °C or 4 °C (**Figure 4—figure supplement 3J-L**). PET-CT  
12 analysis illustrated that the *Mas*<sup>-/-</sup> mice has less <sup>18</sup>F-FDG uptake in BAT than the  
13 WT mice (**Figure 4—figure supplement 4M**). Consistently, the *Mas*<sup>-/-</sup> mice  
14 displayed larger lipid droplets and reduced multilocular structures, and had  
15 reduced UCP1 expression compared with the WT mice (**Figure 4—figure  
16 supplement 4N**). Nevertheless, deletion of *Mas* resulted in a striking repression  
17 of BAT thermogenic protein (UCP-1, UQCRC2 and SDHB) (**Figure 4—figure  
18 supplement 4O**) and genes (e.g. *UCP1*, *PRMD16*, *PGC-1α*, *PGC-1β*, *ATPsyn*,  
19 *COX7a* and *CPT-1α*) (**Figure 4—figure supplement 4P**).

20 To investigate the role of the Mas receptor in BAT, we generated BAT specific  
21 *Mas* knockout mice (*Mas*<sup>-/-</sup> BAT transplanted mice). According to the previous  
22 studies (X. Liu et al., 2013; Yuan et al., 2016), firstly, BAT of the C57B/L6 recipient  
23 mice was removed from the interscapular region. Then, the BAT, which dissected  
24 from strain-, sex- and age-matched *Mas*<sup>-/-</sup> donor mice, was subcutaneously  
25 transplanted into the dorsal interscapular region of the C57B/L6 recipient mice  
26 (WT+*Mas*<sup>-/-</sup>-BAT). As controls, C57B/L6 recipient mice transplanted with C57B/L6

1 BAT (WT+WT-BAT) and C57B/L6 eWAT (WT+WT-eWAT) were used as positive  
2 control and negative control, respectively. After the transplantation, the recipient  
3 mice were fed by HFD for 10 weeks.

4 Interestingly, compared with the WT+WT-BAT control mice, the WT+*Mas*<sup>-/-</sup>-BAT  
5 mice showed greatly impaired HFD-induced insulin resistance. There is no  
6 significant difference between the WT+*Mas*<sup>-/-</sup>-BAT mice and the WT+WT-eWAT  
7 mice in intraperitoneal glucose tolerance test (GTT) and the insulin tolerance test  
8 (ITT) (*Figure 4—figure supplement 4Q, R*). Notably, *Mas*<sup>-/-</sup>-BAT transplantation  
9 also strikingly induced HFD-induced weight gain in the WT+*Mas*<sup>-/-</sup>-BAT mice  
10 compared with the WT+WT-BAT control mice (*Figure 4—figure supplement*  
11 *4S*).

12 More importantly, compared to the WT+WT-BAT control mice, the  
13 WT+*Mas*<sup>-/-</sup>-BAT mice had decreased oxygen consumption ( $VO_2$ ), carbon dioxide  
14 release ( $VCO_2$ ) and energy expenditure (EE) (*Figure 4—figure supplement*  
15 *4T-V*), along with normal food and/or water intake as well as physical activity  
16 (*Figure 4—figure supplement 4W-Y*). Taken together, these results  
17 demonstrate that the Mas receptor can directly induce thermogenic program in  
18 brown adipose tissues.

### 19 **ACE2 pathway induces white fat browning and thermogenesis**

20 Next, we investigated the impact of ACE2/Ang-(1-7) on the process of browning of  
21 WAT, a prominent feature in scWAT. Histological examination of scWAT from the  
22 Ad-ACE2-treated db/db obese mice showed a profound morphological  
23 transformation towards a BAT-like phenotype (smaller adipocytes with multiple  
24 lipid droplets) compared with the control (*Figure 5A*). Meanwhile, markers of  
25 brown adipocytes, such as UCP1, were significantly increased in scWAT of the  
26 Ad-ACE2-treated db/db mice. A much greater induction of transcription factors,

1 including *PRMD16*, *PGC-1 $\alpha$*  and *PGC-1 $\beta$* , occurred in the scWAT of the  
2 Ad-ACE2-treated group (**Figure 5B**). As expected, the Ang-(1-7) treated db/db  
3 mice had a similar browning effect as the Ad-ACE2-treated db/db mice in scWAT.  
4 Morphological brown-like adipocyte and thermogenic gene expression levels  
5 slight increasement were observed in the scWAT after Ang-(1-7) treatment  
6 (**Figure 5C, D**).

7 These alterations were restricted to scWAT, but not to eWAT. As shown in Fig.  
8 5e, the morphology and size of eWAT in the Ad-ACE2-treated db/db mice are  
9 same compared to the control (**Figure 5E**). Meanwhile, no significant increase in  
10 the thermogenic gene expression levels in the eWAT of the Ad-ACE2-treated  
11 db/db mice was found (**Figure 5F**).

## 12 **ACE2 pathway enhances thermogenesis via Akt and PKA signaling**

13 We further investigated the molecular mechanisms through which ACE2 pathway  
14 regulates BAT. Firstly, we performed RNA-seq analysis on BAT isolated from the  
15 WT and the *ACE2* KO mice. Notable differences between the two are displayed  
16 as 3D-PCA analysis and heat map (**Figure 6—figure supplement 5A, B**).  
17 Consistent with the RT-PCR results of BAT in the *ACE2* KO mice, genetic  
18 deficiency of *ACE2* significantly altered expression of genes involved in fatty acid  
19 biosynthesis, lipid catabolism, lipid biosynthesis, fatty acid beta-oxidation and  
20 cholesterol biosynthesis in the BAT of the *ACE2* KO mice (**Figure 6—figure**  
21 **supplement 5C**).

22 Interestingly, we found that the expression level of Akt associated genes were  
23 significantly decreased in the *ACE2* KO mice compared with the WT mice (**Figure**  
24 **6—figure supplement 5D**). The phosphorylation levels of Akt at residues Thr308  
25 was significantly inhibited in BAT of the *ACE2* KO mice (**Figure 6A**). Furthermore,

1 the phosphorylation levels of Akt were dramatically increased in BAT of the  
2 Ad-ACE2 treated mice (**Figure 6B**).

3 These results prompted us to consider whether ACE2 pathway regulates the  
4 function of BAT via Akt signaling. Thus, we treated primary brown adipocytes  
5 which isolated from mice with Ang-(1-7). We found phosphorylation of Akt was  
6 activated by Ang-(1-7), accompanied by UCP1 up-regulation and forkhead  
7 box-containing protein O subfamily-1 (**FoxO1**) phosphorylation (**Figure 6C**).  
8 MK2206, an Akt inhibitor (Chorner & Moorehead, 2018; Matsuzaki, Pouly, &  
9 Canis, 2018), suppressed Ang-(1-7) induced UCP1 up-regulation and FoxO1  
10 phosphorylation (**Figure 6C**). Compared to Ang-(1-7) treated primary brown  
11 adipocytes cells, MK2206 down-regulated the mRNA levels of *UCP1*, *PGC-1 $\alpha$* ,  
12 *Cidea*, *ATPsyn*, *AP2* and *CPT-1 $\alpha$*  genes (**Figure 6D**). More importantly, Ang-(1-7)  
13 treated primary brown adipocytes exhibited higher OCR, and MK2206 inhibited  
14 OCR in the Ang-(1-7) treated primary brown adipocytes (**Figure 6E**). Accordingly,  
15 the ACE2-overexpressing primary brown adipocytes cells showed a similar result.  
16 MK2206 suppressed ACE2 induced up-regulation of protein (UCP1 and  
17 phosphorylated FoxO1) (**Figure 6—figure supplement 6A**) and mRNA (*UCP1*  
18 and *CPT-1 $\alpha$* ) (**Figure 6—figure supplement 6B**), as well as action on OCR  
19 (**Figure 6—figure supplement 6C**). These results suggest that the Akt signaling  
20 are required for the thermogenic activity of ACE2 pathway.

21 After the determination that ACE2 pathway regulates adaptive thermogenesis  
22 through the Akt signaling, we paid attention on whether this program could still be  
23 provoked by protein kinase A (**PKA**) signaling, a pathway known to be involved in  
24 the canonical thermogenic activation of fat cells. Interestingly, we found that the  
25 phosphorylation level of PKA was significantly inhibited in BAT of the *ACE2* KO  
26 mice (**Figure 6F**). Similar results appeared in the *Mas* KO mice (**Figure 6—figure**

1 **supplement 6D**). However, the phosphorylation level of PKA was increased in  
2 BAT of the Ad-ACE2-treated db/db mice (**Figure 6G**).

3 To further elucidate the study on the mechanism of Ang-(1-7)-induced PKA  
4 signaling, we treated Ang-(1-7)-treated primary brown adipocytes with PKA and  
5 adenylylcyase inhibitors, simultaneously. Firstly, the Ang-(1-7)-induced PKA  
6 signaling was validated in primary brown adipocytes (**Figure 6—figure**  
7 **supplement 6E**). However, H89, a PKA inhibitor, significantly blunted the  
8 Ang-(1-7)-induced mRNA levels (*UCP1*, *Cidea* and *AP2*) (**Figure 6H**) and protein  
9 levels (*UCP1* and *PGC-1 $\alpha$* ) (**Figure 6I**). Similar effects were observed by using  
10 SQ-22536, an adenylylcyase inhibitor on the formation of intracellular cAMP  
11 (**Figure 6H, I**). As expected, the Ang-(1-7) treated primary brown adipocytes  
12 exhibited higher OCR, and H89 inhibited OCR in the Ang-(1-7) treated primary  
13 brown adipocytes (**Figure 6J**). Our results thus strongly suggest that the PKA  
14 signaling is important for the thermogenic activity of ACE2 pathway.

15

## 16 **Discussion**

17 RAS is classically known to regulate blood pressure and maintain water and  
18 electrolyte balance. It also plays as a crucial role in metabolic disorders, such as  
19 obesity and insulin resistance (Das, 2016). Comprehensive understanding of the  
20 complexly biological function of the RAS remains a major biomedical challenge. In  
21 the ACE2 pathway, ACE2 is the primary function element, which determines the  
22 content of Ang-(1-7), a direct acting peptide, while MAS receptor determines the  
23 action form of Ang-(1-7). In order to clarify the role and mechanism of the ACE2  
24 pathway in regulation of thermogenesis, it is necessary to systematically analyze  
25 the function of these three elements.

1 In this study, we used six mice models, *ACE2* KO mice, Ad-*ACE2* db/db mice,  
2 Ang-(1-7) treated db/db and HFD mice, *Mas* KO mice and BAT-specific *Mas*  
3 knockout mice (*Mas*<sup>-/-</sup> BAT transplanted mice), respectively. Based on a series of  
4 functional assays in these six mouse models and primary brown adipocytes, we  
5 effectively confirmed that the *ACE2* pathway regulates glucose and lipid  
6 homeostasis. Furthermore, *ACE2* pathway maintains thermogenesis and  
7 systemic energy metabolism. Molecular analyses, including the use of several  
8 inhibitors of Akt and PKA, demonstrate that the effects of *ACE2* pathway on  
9 brown adipocytes are mediated by both the Akt signaling and the PKA signaling,  
10 resulting in the activation of PGC-1 $\alpha$ , followed by activation of UCP1 (**Figure 6K**).  
11 These findings significantly expand our understanding of the biological function of  
12 RAS. Furthermore, our results propose a new concept that the *ACE2* pathway can  
13 improve obesity and the associated metabolic disorders.

14 BAT, which utilizes glucose and fatty acids for thermogenesis, contains large  
15 number of mitochondria and promotes thermogenesis by mitochondrial respiration  
16 through UCP1. BAT-specific UCP1, localized in the inner mitochondrial  
17 membrane, plays a fundamental role in thermogenesis. In response to stimulation,  
18 activation of PGC-1 $\alpha$  up-regulates the expression of BAT-specific UCP1, which  
19 dissipates the proton motive force across the inner mitochondrial membranes,  
20 and consequentially producing ATP (Sambeat et al., 2016; Schreiber et al., 2017).  
21 On the other hand, PGC-1 $\alpha$  induces the acquisition of BAT features, including the  
22 expression of mitochondria and fatty acid-oxidation and thermogenic genes  
23 (Puigserver et al., 1998; Tiraby et al., 2003). We found that the mRNA levels of  
24 *UCP1*, *PGC-1 $\alpha$* , mitochondrial program and fatty acid oxidation related genes  
25 (*PGC-1 $\beta$* , *ATPsyn*, *COX7a*, *COX8b*, *AP2* and *CPT-1 $\alpha$* ) were up-regulated in the  
26 *ACE2* overexpression and the Ang-(1-7) treated db/db mice, whereas

1 down-regulated in the *ACE2* KO or the *Mas* KO mice. These results supported  
2 that *PGC-1 $\alpha$*  and *UCP1* might be critical for the effects of ACE2 pathway on  
3 thermogenesis.

4 We also investigated the underlying mechanisms of ACE2 pathway on the  
5 regulation of BAT via the Akt signaling and the PKA signaling (**Figure 6K**).

6 First, we verified the Akt signaling in the downstream of ACE2 pathway. Akt has  
7 a critical function in cell survival and energy balance. Multiple pieces of evidence  
8 show that activation of PI3K is followed by the activation of Akt, which in turn  
9 triggers a complex cascade of events that include the inhibition of FoxO1  
10 transcription factors and thus the activation of UCP1 and its transcriptional  
11 regulator PGC1 $\alpha$  (Nakae et al., 2008; Ortega-Molina et al., 2012). In human and  
12 3T3-L1 preadipocytes, Ang-(1-7)-Mas signaling promotes adipogenesis via  
13 activation of PI3K-Akt signaling (Than, Leow, & Chen, 2013). AT2R activation  
14 induces white adipocyte browning by increasing PPAR $\gamma$  expression, at least in  
15 part, via PI3K-Akt signaling pathways (Than et al., 2017). We previously reported  
16 that ACE2 and Ang-(1-7) can activate Akt signaling to ameliorate hepatic  
17 steatosis (Cao et al., 2016; Cao et al., 2014). In the present study, the *ACE2* KO  
18 and the *Mas* KO mice displayed a strong decrease in Akt S308 phosphorylation in  
19 BAT. The *ACE2* over-expression or the Ang-(1-7) treatment activated Akt S308  
20 phosphorylation in BAT. Furthermore, the effect of ACE2-Ang-(1-7) on primary  
21 brown adipocytes can be attenuated by Akt inhibitor. These results suggest that  
22 the Akt signaling might also play a role in ACE2 pathway related regulation of BAT  
23 function.

24 Second, we verified the PKA signaling in the downstream of ACE2 pathway.  
25 The Mas receptor was shown to constitutively couple to G $\alpha$ s, including G $\alpha$ i, G $\alpha$ q  
26 and G $\alpha$ 12/13 proteins (Dias-Peixoto et al., 2008; Gomes, Santos, & Guatimosim,

1 2012; Tirupula, Desnoyer, Speth, & Karnik, 2014). In the kidney, Ang-(1-7)  
2 treatment increased cAMP levels and activated PKA through Gas activation by  
3 the Mas receptor (G. C. Liu, Oudit, Fang, Zhou, & Scholey, 2012; Magaldi, Cesar,  
4 de Araujo, Simoes e Silva, & Santos, 2003). Ang-(1-7) regulates insulin secretion  
5 through a Mas-dependent cAMP signaling pathway (Sahr et al., 2016). It is well  
6 known that norepinephrine released from the sympathetic nerves is a powerful  
7 stimulator of BAT. Norepinephrine activates BAT thermogenic program via PKA  
8 signaling, followed by the UCP1-mediated proton uncoupling (Su et al., 2017). In  
9 this study, the PKA signaling in BAT was changed significantly by ACE2 pathway  
10 in mice model. In addition, the effect of ACE2 pathway on primary brown  
11 adipocytes can be depressed by cAMP and PKA inhibitor.

12 Previously, we demonstrate that the ACE2 pathway is involved in the regulation  
13 of glucose and lipid homeostasis with limited understanding of the underlying  
14 mechanisms (Cao et al., 2014; C. Liu et al., 2012; Niu et al., 2008; Shi et al., 2018;  
15 F. Zhang et al., 2016). Here, for the first time, we provide evidence that the  
16 alteration in glucose and lipid homeostasis is associated with the change in  
17 maintaining brown adipocyte function for the facilitation of energy expenditure. In  
18 summary, the ACE2 pathway regulates BAT function and systemic energy  
19 metabolisms which is a potential treatment target for metabolic disorders including  
20 metabolic syndrome, diabetes, dyslipidemia and fatty liver.

21

## 22 **Materials and methods**

### 23 **Mice**

24 Obese C57BLKS/J-Leprdb/Leprdb (*db/db*) male mice, wild-type mice and *Mas* KO  
25 mice were purchased from Nanjing Biological Medicine Research Institute,  
26 Nanjing University, China. Male C57BL/6J mice were purchased from Vital River



1 Laboratory Animal Technology (Beijing, China). *ACE2* KO mice have been  
2 previously described (Niu et al., 2008).

3 The obese diabetic db/db mice at 7-8 weeks of age were used. Adenovirus  
4 ( $5 \times 10^8$  particle forming units (pfu) in a total volume of 100 $\mu$ L of 0.9% wt/vol saline)  
5 was introduced into the db/db mice by tail vein injection. The ad-*ACE2* db/db mice  
6 were used at the 6th day post-virus injection. The db/db mice were treated with  
7 Ang-(1-7) by subcutaneous infusion of Ang-(1-7) (Sigma-Aldrich, St. Louis, MO)  
8 (100 ng/kg/min) or saline using osmotic mini-pumps (Alzet-Durect, Cupertino, CA,  
9 USA Model #1004) for 4 weeks.

10 6-week-old male C57BL/6J mice were used to develop obesity by high-fat (HFD)  
11 diet (60 kcal% fat) (Research Diets, New Brunswick, NJ, USA) for 8 weeks, and  
12 the mice treated with Ang-(1-7) by osmotic mini-pumps at the 5th weeks post-HFD.  
13 8- to 10-weeks old male *ACE2* KO mice and WT controls, *Mas* KO and WT  
14 controls were fed HFD diet for 8 weeks before experimental analysis. The mice  
15 were housed in a room at controlled temperature ( $23^{\circ}\text{C} \pm 1^{\circ}\text{C}$ ) with a 12-hour  
16 light-dark cycle. All animals were handled in accordance with the protocol  
17 approved by the Ethics Committee of Animal Research at Beijing Tongren  
18 Hospital, Capital Medical University, Beijing, China.

### 19 **BAT transplantation**

20 According to the methods described previously (X. Liu et al., 2013; Yuan et al.,  
21 2016), BAT was removed from the interscapular region of 8-week old *Mas* KO  
22 mice or C57BL/6 mice donor mouse and implanted into the interscapular region of  
23 recipient mice. BAT of C57B/L6 recipient mice was removed from the  
24 interscapular region. After cervical dislocation of donor mice, the BAT or eWAT  
25 (also from the epididymal fat pad of 8-week-old C57BL/6 mice) was removed and  
26 peripheral white fat was excluded, and then the remaining BAT (0.2 g) or eWAT

1 (0.2 g) was washed with sterile PBS and transplanted into the interscapular region  
2 of recipients as quickly as possible. Recipient mice were anesthetized by ip  
3 injection with 400 mg/kg body weight avertin, and then BAT or eWAT was  
4 transplanted underneath the skin. The recipient mice were then fed an HFD,  
5 which began immediately after the transplantation and continued for 10 weeks.

#### 6 **Adipocyte oxygen consumption rate (OCR) measurement**

7 Primary brown adipose cells were isolated and cultured for 3 days before plated in  
8 XF cell culture microplates (Seahorse Bioscience). Cells (10,000 cells) were  
9 seeded in each well and each sample has 8 replicates. After 6 days of  
10 differentiation, cultured adipocytes were washed twice and pre-incubated in XF  
11 medium for 1-2 h at room temperature. The oxygen consumption rate was  
12 measured by the XF extracellular flux analyzer (Seahorse Biosciences). The  
13 chemicals (final concentration, 0.2 mM Palmitate: 34  $\mu$ M BSA, 2  $\mu$ M Rotenone)  
14 were preloaded into cartridges and injected into XF wells in succession. OCR was  
15 calculated as a function of time (picomoles per minute).

#### 16 **Glucose tolerance test (GTT)**

17 Mice were fasted for 16 hours (17:00–9:00) with free access to drinking water.  
18 Glucose (1.0 g/kg for the db/db mice and 2.0 g/kg for the HFD mice) was  
19 administered intraperitoneally (i.p.), and blood glucose levels were measured  
20 immediately 0, 15, 30, 60, and 120 min after glucose injection by using an  
21 Accu-Chek glucose monitor (Roche Diagnostics Corp).

#### 22 **Glucose tolerance test (ITT)**

23 ITT was performed by injecting intraperitoneally 0.75 IU/kg of insulin at mice  
24 fasted for 1 hour and measured blood glucose levels at 0, 15, 30, 60, 90, and 120  
25 minutes post injection by using an Accu-Chek glucose monitor (Roche  
26 Diagnostics Corp).

1 **RNA extraction and quantitative Real-time RT-PCR**

2 Total RNA was isolated using TRIzol reagent (Invitrogen, Carlsbad, CA, USA)  
3 according to the manufacturer's instructions. A total of 500ng of RNA was used as  
4 the template for the first-strand cDNA synthesis using ReverTra Ace qPCR RT Kit  
5 (TOYOBO, Osaka, Japan) in accordance with the manufacturer's protocol. The  
6 transcripts were quantified using Light Cycler 480Real-Time PCR system (Roche,  
7 Basel, Switzerland). Primers were designed using Primer Quest (Integrated DNA  
8 Technologies, Inc).

9 **Positron emission tomography–computed tomography (PET-CT)**

10 Siemens Inveon Dedicated PET (dPET) System and Inveon Multimodality (MM)  
11 System (CT/SPECT) (Siemens Preclinical Solutions) was used to detect PET-CT  
12 imaging at Chinese Academy of Medical Sciences. According to the previously  
13 studies (X. Liu et al., 2013; Yuan et al., 2016), mice were allowed to fast overnight  
14 and were lightly anesthetized with isoflurane, and then followed by a tail vein  
15 injection of 18F-FDG (500 mCi). Sixty mins after the injection of the radiotracer,  
16 the mice were subjected to PET/CT analysis. A 10-min CT X-ray for attenuation  
17 correction was scanned before PET-CT scan. Static PET-CT scans were acquired  
18 for 10 minutes, and images were reconstructed by an OSEM3D algorithm  
19 followed by Maximization/Maximum a Posteriori (MAP) or Fast MAP provided by  
20 Inveon Acquisition Workplace (IAW) software. The 3D regions of interest (ROIs)  
21 were drawn over the guided CT images, and the tracer uptake was measured  
22 using Inveon Research Workplace (IRW) (Siemens) software. Individual  
23 quantification of the 18F-FDG uptake in each of the ROI was calculated. The data  
24 for the accumulation of 18F-FDG on micro PET images were expressed as the  
25 standard uptake values (SUVs), which were determined by dividing the relevant

1 ROI concentration by the ratio of the injected activity to the bodyweight. The data  
2 are presented as the mean  $\pm$  SEM.

### 3 **Western blot analysis**

4 Tissues were dissolved in RIPA buffer (150mM sodium chloride, 1.0% Triton  
5 X-100, 0.5% sodium deoxycholate, 0.1% SDS, 50 mM Tris, protease and  
6 phosphatase inhibitor mixture (Roche Diagnostics)). Protein concentrations were  
7 determined using a BCA assay kit (Pierce Diagnostics). Protein was separated by  
8 10% (wt/vol) SDS/PAGE, transferred to a PVDF membrane (Millipore), blocked in  
9 5% (wt/vol) skim milk in TBST (0.02 M Trisbase, 0.14 M Vehicle, 0.1% Tween 20,  
10 pH 7.4), and incubated with primary antibodies overnight at 4°C and then  
11 incubated with secondary antibodies conjugated with HRP. The following primary  
12 antibodies were used: anti-UCP1 (ab10983, Abcam), anti-PGC1 $\alpha$  (ab54481,  
13 Abcam), anti-OXPHOS (ab110413, Abcam), anti-Mas (AAR-013, alomone labs),  
14 anti-Akt (#9272, cell signaling technology), anti-p-Akt308 (#13038, cell signaling  
15 technology), anti-FOXO1 (#2880, cell signaling technology), anti- p-FOXO1  
16 (#84192, cell signaling technology), anti-PKA (#4782, cell signaling technology),  
17 anti-p-PKA (#9621, cell signaling technology), anti-ACE2 (#4335, cell signaling  
18 technology), and actin (#4970, Cell Signaling Technology). Signals were detected  
19 with Super Signal West Pico Chemiluminescent Substrate (Pierce).

### 20 **Histology and immunofluorescence analysis**

21 Tissues fixed in 4% paraformaldehyde were sectioned after being paraffin  
22 embedded. Multiple sections were prepared and stained with hematoxylin and  
23 eosin for general morphological observations. Cells grown on poly-L-lysine  
24 (Sigma)-pretreated coverslips were fixed with 4% paraformaldehyde.  
25 Immunofluorescence staining was performed according to the standard protocol  
26 using the following antibodies and dilutions: UCP1 (1:100 dilution; Santa Cruz

1 Biotechnologies), MitoTracker Red (1:1000 dilution; Invitrogen). Incubations were  
2 performed overnight in a humidified chamber at 4°C. 40,  
3 6-diamidino-2-phenylindole staining was used to mark the cell nuclei. The images  
4 were acquired by microscope (DS-R11; Nikon)

#### 5 **Metabolic rate and physical activity**

6 Oxygen consumption and physical activity were determined at 12wk of age with a  
7 TSE LabMaster, as previously described (Chi & Wang, 2011). Mice were  
8 acclimated to the system for 20-24 hours, and then VO<sub>2</sub> and VCO<sub>2</sub> were  
9 measured during the next 24 hours. Voluntary activity of each mouse was  
10 measured with an optical beam technique (Opto-M3, Columbus Instruments,  
11 Columbus, OH, USA) over 24 hours and expressed as 24 hours average activity.  
12 Heat production and respiratory exchange ratio (RER) were then calculated (X.  
13 Liu et al., 2013).

#### 14 **RNA-Seq analysis**

15 Total RNA was extracted from *ACE2* KO or WT primary brown adipocytes by  
16 Trizol reagent (Invitrogen), respectively. Extracted RNA samples were sent to  
17 Novel Bioinformatics company (Shanghai, China) for RNA-seq. RNA with RIN>8.0  
18 is right for cDNA library construction. The cDNA libraries were processed for the  
19 proton sequencing according to the commercially available protocols. Data were  
20 submitted to the GEO archive. Fisher's exact test was calculated to select the  
21 significant pathway, and the threshold of significance was defined by P-value and  
22 false discovery rate (FDR) (Dupuy et al., 2007).

#### 23 **Infrared thermography and core temperature**

24 Mice were exposed to a cold chamber (4°C) with one mouse per cage for up to 6  
25 hours, with free access to food and water. An infrared digital thermographic  
26 camera was used to taken images (E60: Compact Infrared Thermal Imaging

1 Camera; FLIR). The images were analyzed by FLIR Quick Report software (FLIR  
2 ResearchIR Max 3.4; FLIR). A rectal probe connected to a digital thermometer  
3 was used to measure core body temperature (Yellow Spring Instruments).

#### 4 **Statistical analysis**

5 All of the data are presented as the mean  $\pm$  SD. The data were analyzed by  
6 Student's t test or one-way ANOVA (with Bonferroni post-hoc tests to compare  
7 replicate means) when appropriate. Statistical comparisons were performed using  
8 Prism5 (GraphPad Software, San Diego, CA). P values less than 0.05 were  
9 considered statistically significant. Representative results from at least three  
10 independent experiments are shown unless otherwise stated.

11

#### 12 **Acknowledgements**

13 This work was supported by grants from National Key R&D Program of China  
14 (2017YFC0909600) and National Natural Science Foundation of China  
15 (81561128015, 81471014) to Jinkui Yang, National Natural Science Foundation  
16 of China (81670774, 82070850) and Beijing Natural Science Foundation  
17 (7162047) to Xi Cao.

18

#### 19 **Author contributions**

20 Xi Cao, Tingting Shi and Chuanhai Zhang designed the experiments, performed  
21 the experiments and wrote the manuscript. Lini Song, Yichen Zhang, Jingyi Liu  
22 and Fangyuan Yang performed the experiments, Wanzhu Jin and Amin Xu  
23 designed the experiments. Charles N Rotimi contributed to the interpretation of  
24 results and wrote the manuscript. Jinkui Yang conceived the idea for the study,  
25 designed the experiments and wrote the manuscript.

1

2 **Additional information**

3 **Supplementary materials:** Please refer to [Supplementary Figure S1-S6](#).

4 **Competing interests:** The authors declare no competing interests.

5 **Data Availability:** Sources for materials used in this study are described in

6 Materials and Methods.

7

8

## 1 References

- 2 Cao, X., Yang, F., Shi, T., Yuan, M., Xin, Z., Xie, R., Li, S., Li, H., & Yang, J. K. (2016). Angiotensin-converting  
3 enzyme 2/angiotensin-(1-7)/Mas axis activates Akt signaling to ameliorate hepatic steatosis. *Sci*  
4 *Rep*, 6, 21592. doi: 10.1038/srep21592
- 5 Cao, X., Yang, F. Y., Xin, Z., Xie, R. R., & Yang, J. K. (2014). The ACE2/Ang-(1-7)/Mas axis can inhibit hepatic  
6 insulin resistance. *Mol Cell Endocrinol*, 393(1-2), 30-38. doi: 10.1016/j.mce.2014.05.024
- 7 Chi, Q. S., & Wang, D. H. (2011). Thermal physiology and energetics in male desert hamsters (*Phodopus*  
8 *roborovskii*) during cold acclimation. *J Comp Physiol B*, 181(1), 91-103. doi:  
9 10.1007/s00360-010-0506-6
- 10 Chorney, P. M., & Moorehead, R. A. (2018). A-674563, a putative AKT1 inhibitor that also suppresses CDK2  
11 activity, inhibits human NSCLC cell growth more effectively than the pan-AKT inhibitor, MK-2206.  
12 *PLoS One*, 13(2), e0193344. doi: 10.1371/journal.pone.0193344
- 13 Clarke, N. E., & Turner, A. J. (2012). Angiotensin-converting enzyme 2: the first decade. *Int J Hypertens*,  
14 2012, 307315. doi: 10.1155/2012/307315
- 15 Das, U. N. (2016). Renin-angiotensin-aldosterone system in insulin resistance and metabolic syndrome. *J*  
16 *Transl Int Med*, 4(2), 66-72. doi: 10.1515/jtim-2016-0022
- 17 Dias-Peixoto, M. F., Santos, R. A., Gomes, E. R., Alves, M. N., Almeida, P. W., Greco, L., Rosa, M., Fauler, B.,  
18 Bader, M., Alenina, N., & Guatimosim, S. (2008). Molecular mechanisms involved in the  
19 angiotensin-(1-7)/Mas signaling pathway in cardiomyocytes. *Hypertension*, 52(3), 542-548. doi:  
20 10.1161/HYPERTENSIONAHA.108.114280
- 21 Dong, M., Lin, J., Lim, W., Jin, W., & Lee, H. J. (2017). Role of brown adipose tissue in metabolic syndrome,  
22 aging, and cancer cachexia. *Front Med*. doi: 10.1007/s11684-017-0555-2
- 23 Dupuy, D., Bertin, N., Hidalgo, C. A., Venkatesan, K., Tu, D., Lee, D., Rosenberg, J., Svrzikapa, N., Blanc, A.,  
24 Carnec, A., Carvunis, A. R., Pulak, R., Shingles, J., Reece-Hoyes, J., Hunt-Newbury, R., Viveiros, R.,  
25 Mohler, W. A., Tasan, M., Roth, F. P., Le Peuch, C., Hope, I. A., Johnsen, R., Moerman, D. G.,  
26 Barabasi, A. L., Baillie, D., & Vidal, M. (2007). Genome-scale analysis of in vivo spatiotemporal  
27 promoter activity in *Caenorhabditis elegans*. *Nat Biotechnol*, 25(6), 663-668. doi:  
28 10.1038/nbt1305
- 29 Gomes, E. R., Santos, R. A., & Guatimosim, S. (2012). Angiotensin-(1-7)-mediated signaling in  
30 cardiomyocytes. *Int J Hypertens*, 2012, 493129. doi: 10.1155/2012/493129
- 31 Hashimoto, T., Perlot, T., Rehman, A., Trichereau, J., Ishiguro, H., Paolino, M., Sigl, V., Hanada, T., Hanada, R.,  
32 Lipinski, S., Wild, B., Camargo, S. M., Singer, D., Richter, A., Kuba, K., Fukamizu, A., Schreiber, S.,  
33 Clevers, H., Verrey, F., Rosenstiel, P., & Penninger, J. M. (2012). ACE2 links amino acid malnutrition  
34 to microbial ecology and intestinal inflammation. *Nature*, 487(7408), 477-481. doi:



- 1 10.1038/nature11228
- 2 Liu, C., Lv, X. H., Li, H. X., Cao, X., Zhang, F., Wang, L., Yu, M., & Yang, J. K. (2012). Angiotensin-(1-7)  
3 suppresses oxidative stress and improves glucose uptake via Mas receptor in adipocytes. *Acta*  
4 *Diabetol*, 49(4), 291-299. doi: 10.1007/s00592-011-0348-z
- 5 Liu, G. C., Oudit, G. Y., Fang, F., Zhou, J., & Scholey, J. W. (2012). Angiotensin-(1-7)-induced activation of  
6 ERK1/2 is cAMP/protein kinase A-dependent in glomerular mesangial cells. *Am J Physiol Renal*  
7 *Physiol*, 302(6), F784-790. doi: 10.1152/ajprenal.00455.2011
- 8 Liu, X., Zheng, Z., Zhu, X., Meng, M., Li, L., Shen, Y., Chi, Q., Wang, D., Zhang, Z., Li, C., Li, Y., Xue, Y.,  
9 Speakman, J. R., & Jin, W. (2013). Brown adipose tissue transplantation improves whole-body  
10 energy metabolism. *Cell Res*, 23(6), 851-854. doi: 10.1038/cr.2013.64
- 11 Magaldi, A. J., Cesar, K. R., de Araujo, M., Simoes e Silva, A. C., & Santos, R. A. (2003). Angiotensin-(1-7)  
12 stimulates water transport in rat inner medullary collecting duct: evidence for involvement of  
13 vasopressin V2 receptors. *Pflugers Arch*, 447(2), 223-230. doi: 10.1007/s00424-003-1173-1
- 14 Matsuzaki, S., Pouly, J. L., & Canis, M. (2018). In vitro and in vivo effects of MK2206 and chloroquine  
15 combination therapy on endometriosis: Autophagy may be required for regrowth of  
16 endometriosis. *Br J Pharmacol*. doi: 10.1111/bph.14170
- 17 Nakae, J., Cao, Y., Oki, M., Orba, Y., Sawa, H., Kiyonari, H., Iskandar, K., Suga, K., Lombes, M., & Hayashi, Y.  
18 (2008). Forkhead transcription factor FoxO1 in adipose tissue regulates energy storage and  
19 expenditure. *Diabetes*, 57(3), 563-576. doi: 10.2337/db07-0698
- 20 Niu, M. J., Yang, J. K., Lin, S. S., Ji, X. J., & Guo, L. M. (2008). Loss of angiotensin-converting enzyme 2 leads  
21 to impaired glucose homeostasis in mice. *Endocrine*, 34(1-3), 56-61. doi:  
22 10.1007/s12020-008-9110-x
- 23 Ortega-Molina, A., Efeyan, A., Lopez-Guadamillas, E., Munoz-Martin, M., Gomez-Lopez, G., Canamero, M.,  
24 Mulero, F., Pastor, J., Martinez, S., Romanos, E., Mar Gonzalez-Barroso, M., Rial, E., Valverde, A.  
25 M., Bischoff, J. R., & Serrano, M. (2012). Pten positively regulates brown adipose function, energy  
26 expenditure, and longevity. *Cell Metab*, 15(3), 382-394. doi: 10.1016/j.cmet.2012.02.001
- 27 Puigserver, P., Wu, Z., Park, C. W., Graves, R., Wright, M., & Spiegelman, B. M. (1998). A cold-inducible  
28 coactivator of nuclear receptors linked to adaptive thermogenesis. *Cell*, 92(6), 829-839.
- 29 Sahr, A., Wolke, C., Maczewsky, J., Krippeit-Drews, P., Tetzner, A., Drews, G., Venz, S., Gurtler, S., van den  
30 Brandt, J., Berg, S., Doring, P., Dombrowski, F., Walther, T., & Lendeckel, U. (2016). The  
31 Angiotensin-(1-7)/Mas Axis Improves Pancreatic beta-Cell Function in Vitro and in Vivo.  
32 *Endocrinology*, 157(12), 4677-4690. doi: 10.1210/en.2016-1247
- 33 Sambeat, A., Gulyaeva, O., Dempersmier, J., Tharp, K. M., Stahl, A., Paul, S. M., & Sul, H. S. (2016). LSD1  
34 Interacts with Zfp516 to Promote UCP1 Transcription and Brown Fat Program. *Cell Rep*, 15(11),  
35 2536-2549. doi: 10.1016/j.celrep.2016.05.019

- 1 Santos, R. A., Simoes e Silva, A. C., Maric, C., Silva, D. M., Machado, R. P., de Buhr, I., Heringer-Walther, S.,  
2 Pinheiro, S. V., Lopes, M. T., Bader, M., Mendes, E. P., Lemos, V. S., Campagnole-Santos, M. J.,  
3 Schultheiss, H. P., Speth, R., & Walther, T. (2003). Angiotensin-(1-7) is an endogenous ligand for  
4 the G protein-coupled receptor Mas. *Proc Natl Acad Sci U S A*, *100*(14), 8258-8263. doi:  
5 10.1073/pnas.1432869100
- 6 Schreiber, R., Diwoky, C., Schoiswohl, G., Feiler, U., Wongsiriroj, N., Abdellatif, M., Kolb, D., Hoeks, J.,  
7 Kershaw, E. E., Sedej, S., Schrauwen, P., Haemmerle, G., & Zechner, R. (2017). Cold-Induced  
8 Thermogenesis Depends on ATGL-Mediated Lipolysis in Cardiac Muscle, but Not Brown Adipose  
9 Tissue. *Cell Metab*, *26*(5), 753-763.e757. doi: 10.1016/j.cmet.2017.09.004
- 10 Shi, T. T., Yang, F. Y., Liu, C., Cao, X., Lu, J., Zhang, X. L., Yuan, M. X., Chen, C., & Yang, J. K. (2018).  
11 Angiotensin-converting enzyme 2 regulates mitochondrial function in pancreatic beta-cells.  
12 *Biochem Biophys Res Commun*, *495*(1), 860-866. doi: 10.1016/j.bbrc.2017.11.055
- 13 Su, J., Wu, W., Huang, S., Xue, R., Wang, Y., Wan, Y., Zhang, L., Qin, L., Zhang, Q., Zhu, X., Zhang, Z., Ye, H.,  
14 Wu, X., & Li, Y. (2017). PKA-RIIB Deficiency Induces Brown Fatlike Adipocytes in Inguinal WAT and  
15 Promotes Energy Expenditure in Male FVB/NJ Mice. *Endocrinology*, *158*(3), 578-591. doi:  
16 10.1210/en.2016-1581
- 17 Than, A., Leow, M. K., & Chen, P. (2013). Control of adipogenesis by the autocrine interplays between  
18 angiotensin 1-7/Mas receptor and angiotensin II/AT1 receptor signaling pathways. *J Biol Chem*,  
19 *288*(22), 15520-15531. doi: 10.1074/jbc.M113.459792
- 20 Than, A., Xu, S., Li, R., Leow, M. S., Sun, L., & Chen, P. (2017). Angiotensin type 2 receptor activation  
21 promotes browning of white adipose tissue and brown adipogenesis. *Signal Transduct Target Ther*,  
22 *2*, 17022. doi: 10.1038/sigtrans.2017.22
- 23 Tiraby, C., Tavernier, G., Lefort, C., Larrouy, D., Bouillaud, F., Ricquier, D., & Langin, D. (2003). Acquirement  
24 of brown fat cell features by human white adipocytes. *J Biol Chem*, *278*(35), 33370-33376. doi:  
25 10.1074/jbc.M305235200
- 26 Tirupula, K. C., Desnoyer, R., Speth, R. C., & Karnik, S. S. (2014). Atypical signaling and functional  
27 desensitization response of MAS receptor to peptide ligands. *PLoS One*, *9*(7), e103520. doi:  
28 10.1371/journal.pone.0103520
- 29 Trayhurn, P., & Wusteman, M. C. (1990). Lipogenesis in genetically diabetic (db/db) mice: developmental  
30 changes in brown adipose tissue, white adipose tissue and the liver. *Biochim Biophys Acta*,  
31 *1047*(2), 168-174.
- 32 Yuan, X., Hu, T., Zhao, H., Huang, Y., Ye, R., Lin, J., Zhang, C., Zhang, H., Wei, G., Zhou, H., Dong, M., Zhao, J.,  
33 Wang, H., Liu, Q., Lee, H. J., Jin, W., & Chen, Z. J. (2016). Brown adipose tissue transplantation  
34 ameliorates polycystic ovary syndrome. *Proc Natl Acad Sci U S A*, *113*(10), 2708-2713. doi:  
35 10.1073/pnas.1523236113
- 36 Zhang, F., Liu, C., Wang, L., Cao, X., Wang, Y. Y., & Yang, J. K. (2016). Antioxidant effect of angiotensin (17) in

1 the protection of pancreatic beta cell function. *Mol Med Rep*, 14(3), 1963-1969. doi:  
2 10.3892/mmr.2016.5514

3 Zhang, Z., Zhang, H., Li, B., Meng, X., Wang, J., Zhang, Y., Yao, S., Ma, Q., Jin, L., Yang, J., Wang, W., & Ning,  
4 G. (2014). Berberine activates thermogenesis in white and brown adipose tissue. *Nat Commun*, 5,  
5 5493. doi: 10.1038/ncomms6493

6

7

## 1 Figures

## Figure 1.

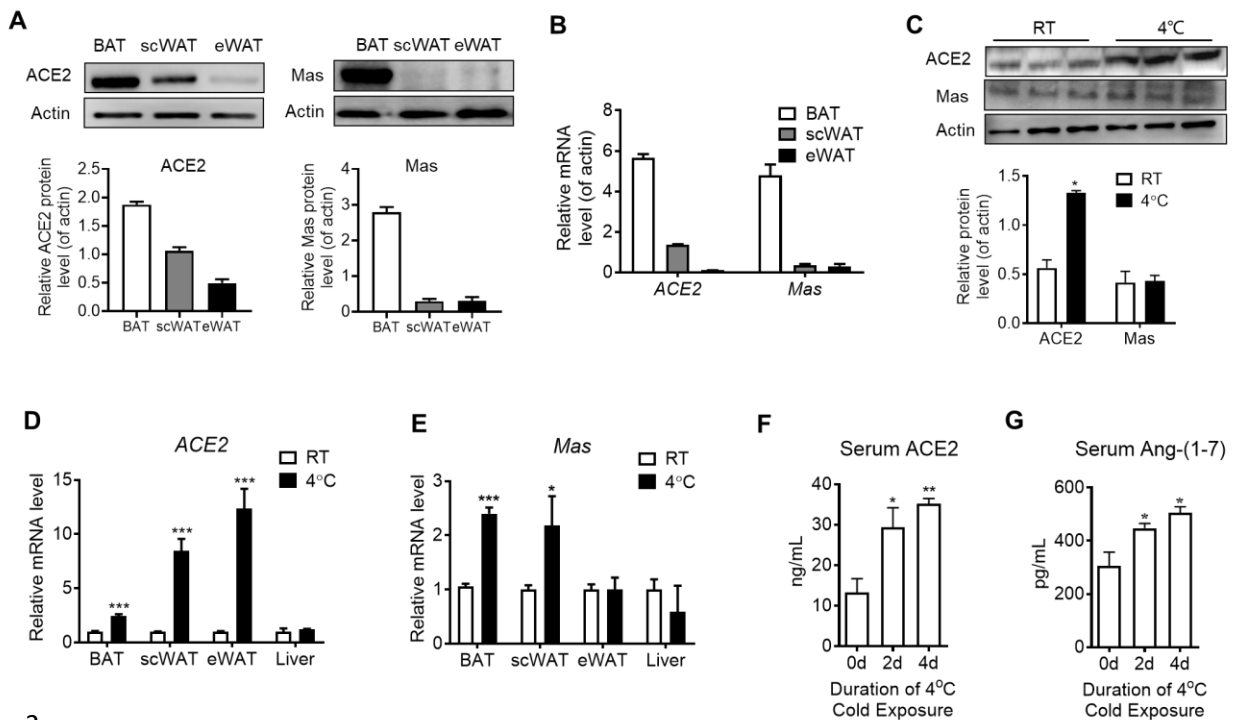

2

3

4 **Figure 1.** ACE2 pathway is activated by cold exposure.

5 Eight-week-old male C57BL/6J mice were housed at room temperature (RT) for 2 weeks  
6 before cold exposure at 4°C for various time periods as indicated.

7 **(A)** Levels of ACE2 and Mas protein from interscapular brown adipose tissue (BAT),  
8 subcutaneous and epididymal white adipose tissue (scWAT and eWAT) of C57BL/6 mice  
9 at room temperature (RT), as determined by Western blotting. n=3/each group.

10 **(B)** Levels of ACE2 and Mas mRNA from BAT, scWAT and eWAT of C57BL/6 mice at RT,  
11 as determined by qPCR. n=5/each group.

12 **(C)** Levels of ACE2 and Mas protein from interscapular BAT of C57BL/6 mice at RT or  
13 exposed to 4°C for 6 hours, as determined by Western blotting. n=3/each group.

14 **(D, E)** Levels of ACE2 and Mas mRNA from BAT, scWAT, eWAT and liver of C57BL/6  
15 mice exposed to 4°C for 24 hours, as determined by qPCR. n=5/each group.

16 **(F, G)** Serum levels of ACE2 (f) and Ang-(1-7) (g), as determined by ELISA. n=6/each  
17 group.

18 Data represent mean  $\pm$  SEM; \* $p < 0.05$ , \*\* $p < 0.01$  and \*\*\* $p < 0.001$  vs Control group by  
19 Student's *t*-test.

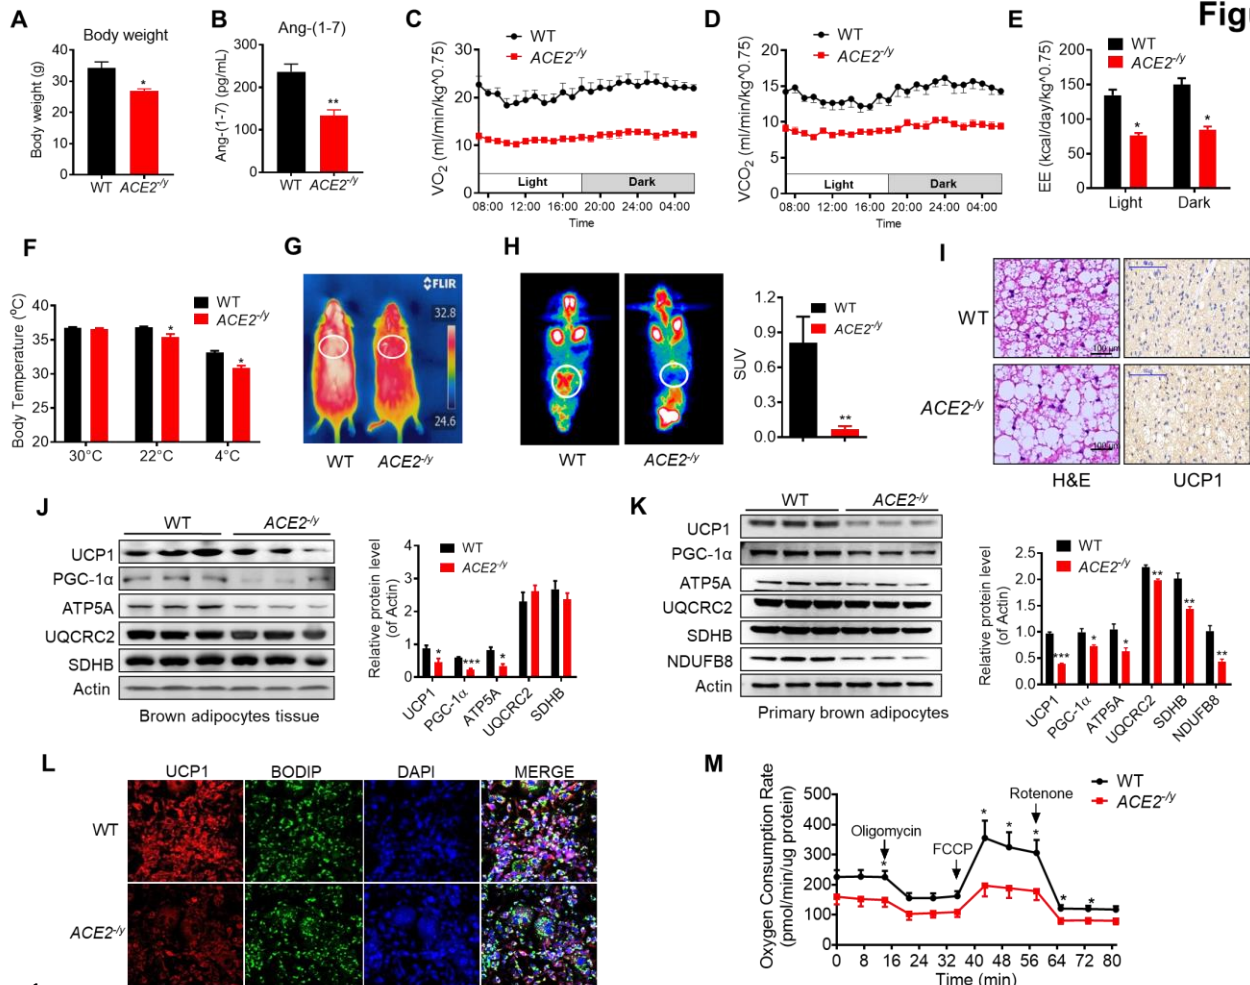

1  
2  
3  
4  
5  
6  
7  
8  
9  
10  
11  
12  
13  
14  
15  
16  
17  
18  
19  
20  
21  
22  
23  
24  
25  
26  
27

**Figure 2.** ACE2 deficiency impairs thermogenesis, brown adipose tissue (BAT) activity, and energy metabolism.

Eight-week-old male ACE2<sup>-/-</sup> mice and their wild type (WT) mice (controls) had a high-fat diet (HFD) for 8 weeks.

**(A)** Body weight of ACE2<sup>-/-</sup> and WT mice fed a HFD for 8 weeks.

**(B)** Serum levels of Ang-(1-7), as determined by ELISA.

**(C-E)** Energy expenditure was evaluated by measurement of oxygen consumption (VO<sub>2</sub>) **(C)**, carbon dioxide release (VCO<sub>2</sub>) **(D)** and energy expenditure (EE) **(E)** over a 24h period.

**(F)** Core body temperature at 30°C, 22°C and 4°C for 8 hours in ACE2<sup>-/-</sup> and WT mice.

**(G)** Infrared thermal images at 22°C in ACE2<sup>-/-</sup> and WT mice.

**(H)** Representative tomography-computed tomography (PET-CT) image and standard uptake values (SUVs).

**(I)** Representative haematoxylin and eosin (H&E) staining and uncoupling protein-1 (UCP1) immunostaining from BAT sections of ACE2<sup>-/-</sup> and WT mice exposure at 4°C.

**(J)** Representative western blots showing the changes of key proteins of energy expenditure and thermogenesis in BAT of ACE2<sup>-/-</sup> and WT mice exposure at 4°C (n =3/each group).

**(K)** Representative western blots showing the key protein changes in primary brown adipocytes from ACE2<sup>-/-</sup> and WT mice (n =3/each group).

**(L)** Representative immunofluorescent images of *in vitro* differentiated primary brown adipocytes of ACE2<sup>-/-</sup> and WT mice, primary brown adipocytes show staining for UCP1 (red), boron-dipyrromethene (BODIPY) (green; neutral lipid dye), and DAPI (blue; nuclei).

**(M)** Continuous measurement of oxygen consumption rate (OCR) in primary brown adipocytes from ACE2<sup>-/-</sup> mice and WT littermates. Oxygen consumption was performed

1 under basal conditions, following the addition of oligomycin (14 $\mu$ M), the pharmacological  
2 uncoupler FCCP (10 $\mu$ M) or the Complex III and I inhibitor antimycin A and rotenone (4 $\mu$ M  
3 each).  
4 n=5-7/each group unless otherwise stated; Data represent mean  $\pm$  SEM; \* $p$  < 0.05, \*\* $p$  <  
5 0.01 vs WT group by Mann-Whitney U test.  
6 The online version of this article includes the following figure supplement(s) for figure 2:  
7 **Figure supplement 1.** ACE2 deficiency impairs adaptative thermogenesis by cold  
8 stimulation.  
9

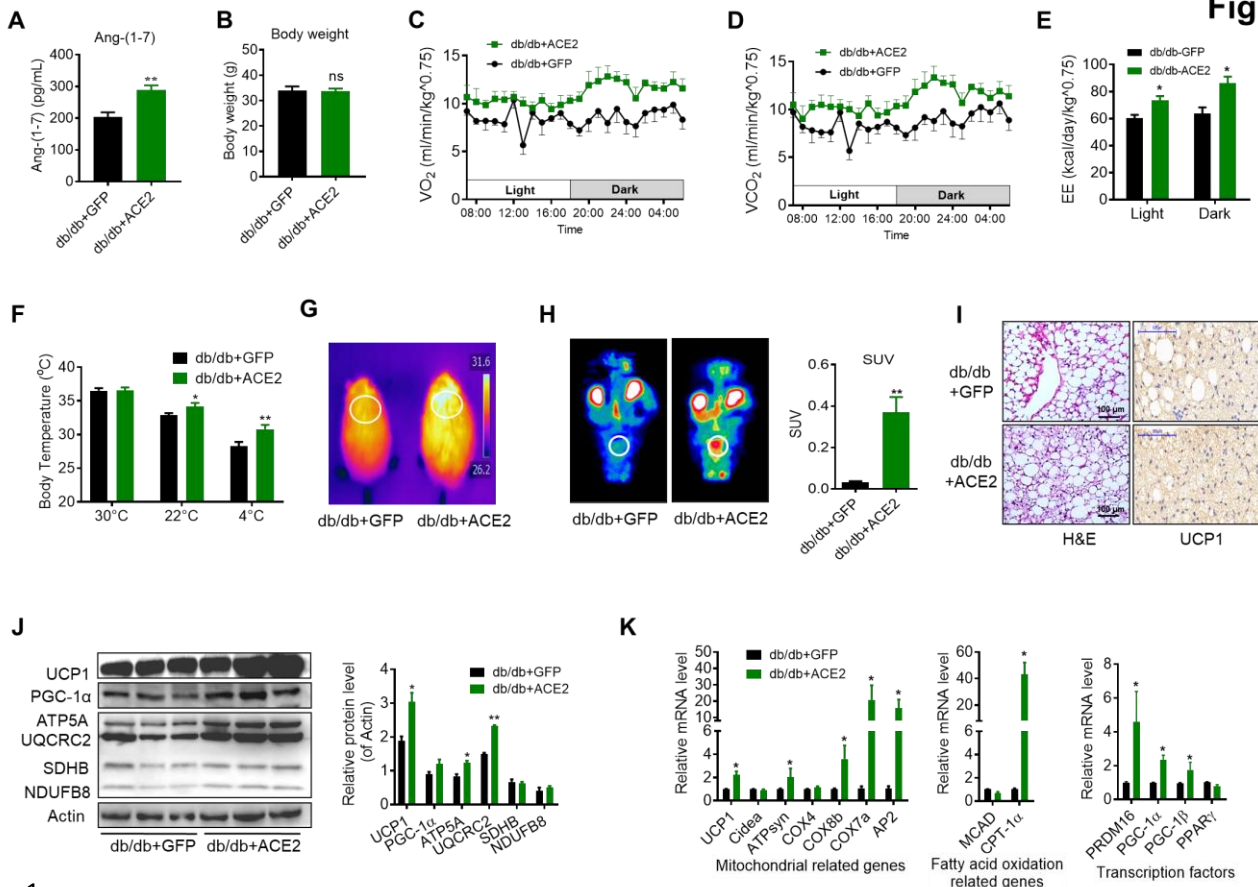

1

2

3 **Figure 3.** ACE2 enhances thermogenesis, brown adipose tissue (BAT) activity, and  
4 energy metabolism in db/db obese mice.

5 ACE2 over-expression adenovirus (Ad-ACE2) and Ad-GFP (control) were introduced into  
6 the db/db obese mice by tail vein injection. The ad-ACE2 and Ad-GFP treated db/db mice  
7 were used at the 6th day post-virus injection.

8 **(A)** Serum levels of Ang-(1-7), as determined by ELISA

9 **(B)** Body weight of ad-ACE2 and Ad-GFP treated db/db mice at the 6th day post-virus  
10 injection.

11 **(C-E)** Energy expenditure was evaluated by measurement of oxygen consumption ( $VO_2$ )  
12 **(C)**, carbon dioxide release ( $VCO_2$ ) **(D)** and energy expenditure (EE) **(E)** over a 24h  
13 period.

14 **(F)** Core body temperature at 30°C, 22°C and 4°C for 8 hours.

15 **(G)** Infrared thermal images at 22°C in db/db+ACE2 and db/db+GFP mice.

16 **(H)** Representative tomography-computed tomography (PET-CT) image and standard  
17 uptake values (SUVs).

18 **(I)** Representative H&E staining and UCP1 immunostaining from BAT sections of  
19 db/db+ACE2 and db/db+GFP mice exposure at 4°C.

20 **(J)** Representative western blots showing the changes of key proteins of energy  
21 expenditure and thermogenesis in BAT of db/db+ACE2 and db/db+GFP mice exposure  
22 at 4°C.

23 **(K)** Relative mRNA levels of mitochondrial related genes, fatty acid oxidation related  
24 genes and transcription factors in BAT of db/db+ACE2 and db/db+GFP mice exposure at  
25 4°C.

- 1 n=5-7/each group; Data represent mean  $\pm$  SEM; \* $p < 0.05$ , \*\* $p < 0.01$  vs Ad+GFP group
- 2 by Mann-Whitney U test.
- 3 The online version of this article includes the following figure supplement(s) for figure 3:
- 4 **Figure supplement 2.** ACE2 enhance BAT activity and whole-body energy metabolism
- 5 in db/db mice.
- 6



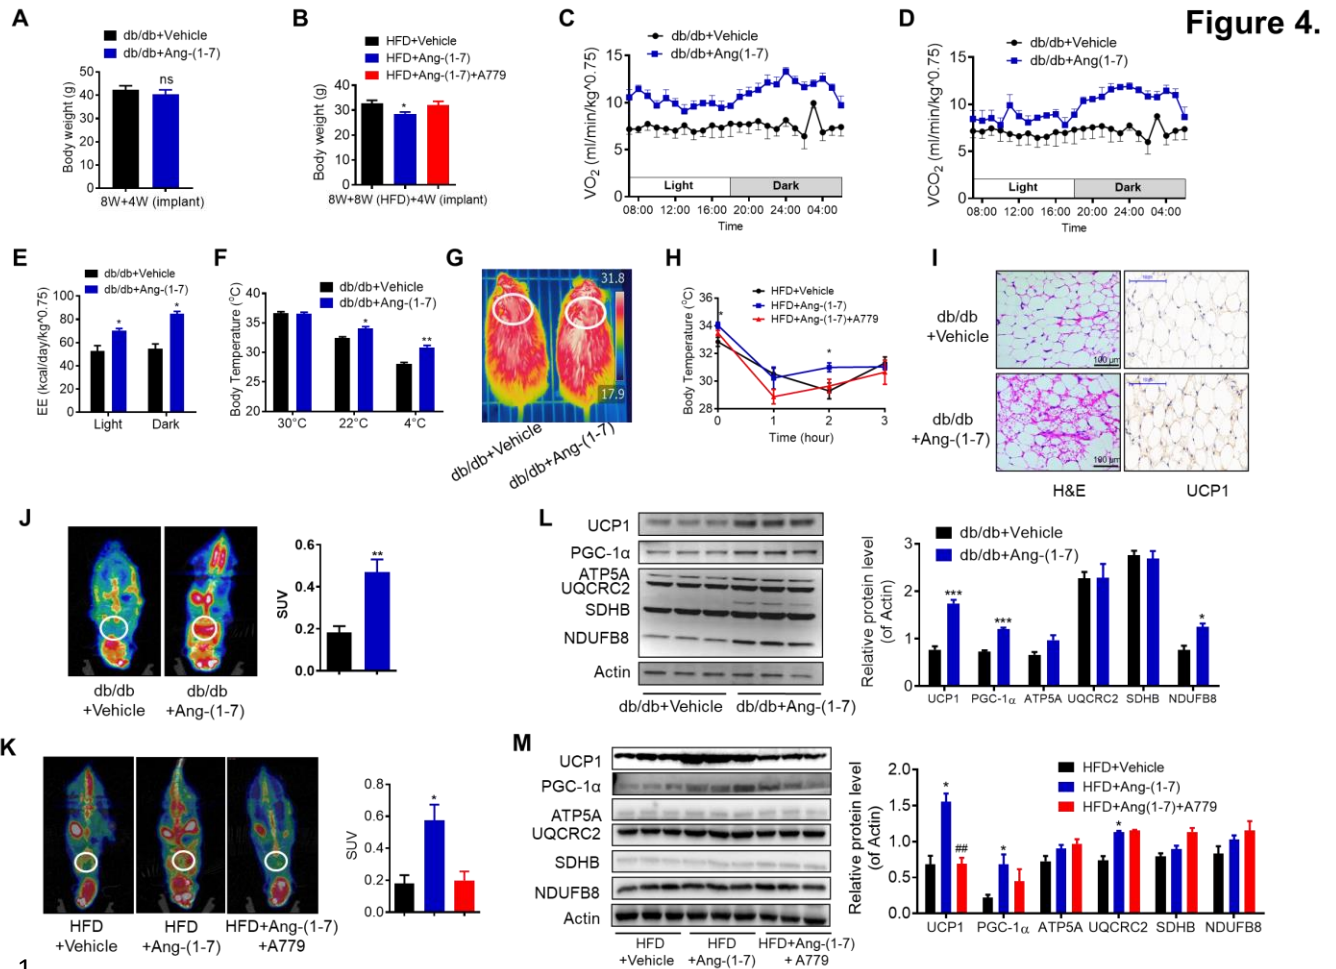

1  
2  
3  
4  
5  
6  
7  
8  
9  
10  
11  
12  
13  
14  
15  
16  
17  
18  
19  
20  
21  
22  
23  
24  
25  
26  
27  
28

**Figure 4.** Ang-(1-7) promotes thermogenesis, brown adipose tissue (BAT) activity, and energy metabolism in the db/db and the HFD-induced obese mice.

Ang-(1-7) administration by subcutaneous implanted micro-osmotic pumps in the db/db obese mice and the high-fat diet (HFD)-induced obese mice were used. The db/db mice were treated with Ang-(1-7) by subcutaneous infusion of Ang-(1-7) or saline using osmotic mini-pumps for 4 weeks. 6-week-old male C57BL/6J mice were used to develop obesity by HFD diet for 8 weeks, and the mice treated with Ang-(1-7), A779 (an Ang-(1-7) antagonist) or saline by osmotic mini-pumps at the 4th weeks post-HFD.

**(A)** Body weight of db/db+Ang-(1-7) and db/db+Vehicle mice at the 4th week post micro-osmotic pumps implantation.

**(B)** Body weight of HFD+Ang-(1-7), HFD+A779 and HFD+Vehicle mice at the 4th week post micro-osmotic pumps implantation.

**(C-E)** Energy expenditure was evaluated by measurement of oxygen consumption (VO<sub>2</sub>) (c), of carbon dioxide release (VCO<sub>2</sub>) (d) and of energy expenditure (EE) (e) over a 24h period in db/db+Ang-(1-7) and db/db+Vehicle mice.

**(F)** Core body temperature at 30°C, 22°C and 4°C for 8 hours in db/db+Ang-(1-7) and db/db+Vehicle mice.

**(G)** Infrared thermal images at 22°C in db/db+Ang-(1-7) and db/db+Vehicle mice.

**(H)** Core body temperature at 4°C for the indicated lengths of time in HFD+Ang-(1-7), HFD+A779 and HFD+Vehicle mice.

**(I)** Representative H&E staining and UCP1 immunostaining from BAT sections of db/db+Ang-(1-7) and db/db+Vehicle mice exposure at 4°C.

**(J)** Representative Positron emission tomography-computed tomography (PET-CT) image and SUVs of db/db+Ang-(1-7) and db/db+Vehicle mice.

**(K)** Representative PET-CT image and SUVs of HFD+Ang-(1-7), HFD+A779 and HFD+Vehicle mice.

- 1 **(L)** Representative western blots showing the changes of key proteins of energy  
2 expenditure and thermogenesis in BAT of db/db+Ang-(1-7) and db/db+Vehicle mice  
3 exposure at 4°C.
- 4 **(M)** Representative western blots showing the changes of key proteins of energy  
5 expenditure and thermogenesis in BAT of HFD+Ang-(1-7), HFD+A779 and HFD+Vehicle  
6 mice exposure at 4°C. n=5-7/each group; Data represent mean  $\pm$  SEM; \* $p < 0.05$ , \*\* $p <$   
7  $0.01$  vs Vehicle group by Student's  $t$ -test.
- 8 The online version of this article includes the following figure supplement(s) for figure 4:
- 9 **Figure supplement 3.** Ang-(1-7) promoted thermogenesis and energetic metabolism in  
10 BAT of db/db mice during cold challenge.
- 11 **Figure supplement 4.** Ablation of Mas impairs thermogenesis, BAT activity, and  
12 energetic metabolism.
- 13

Figure 5.

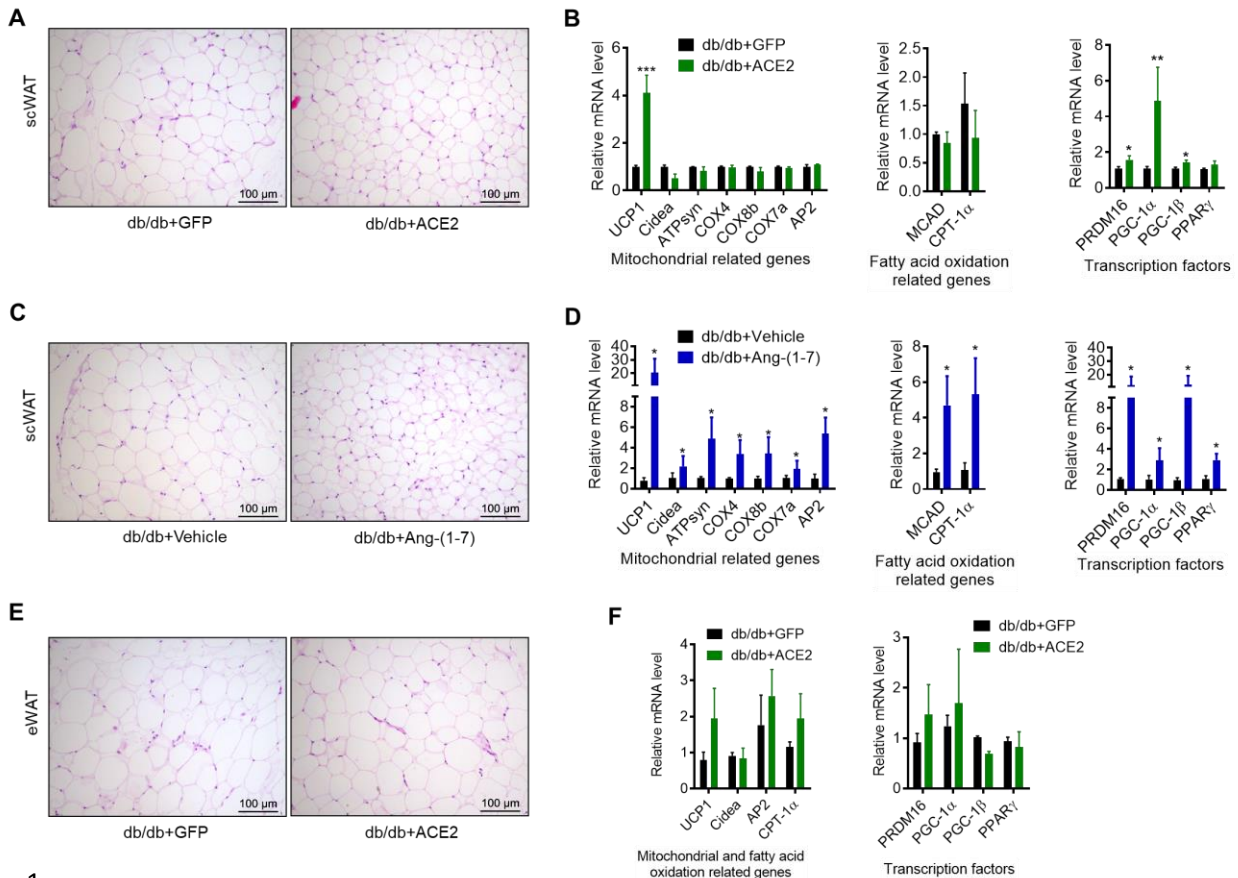

1  
2  
3  
4  
5  
6  
7  
8  
9  
10  
11  
12  
13  
14  
15  
16  
17  
18  
19  
20  
21  
22

**Figure 5. ACE2 pathway induced white adipose tissue browning in the db/db obese mice**

(A) Representative H&E staining from subcutaneous white adipose tissue (scWAT) sections of db/db+ACE2 and db/db+GFP mice exposure at 4°C.

(B) Relative mRNA levels of mitochondrial related genes, fatty acid oxidation related genes and transcription factors in scWAT of db/db+ACE2 and db/db+GFP mice exposure at 4°C.

(C) Representative H&E staining from scWAT sections of db/db+Ang-(1-7) and db/db+Vehicle mice exposure at 4°C.

(D) Relative mRNA levels of mitochondrial related genes, fatty acid oxidation related genes and transcription factors in scWAT of db/db+Ang-(1-7) and db/db+Vehicle mice exposure at 4°C.

(E) Representative H&E staining from epididymal white adipose tissue (eWAT) sections of db/db+ACE2 and db/db+GFP mice exposure at 4°C.

(F) Relative mRNA levels of mitochondrial related genes, fatty acid oxidation related genes and transcription factors in eWAT of db/db+ACE2 and db/db+GFP mice exposure at 4°C.

n=5-7/each group; Data represent mean ± SEM; \*p < 0.05, \*\*p < 0.01 vs GFP/Vehicle group by Student's t-test.

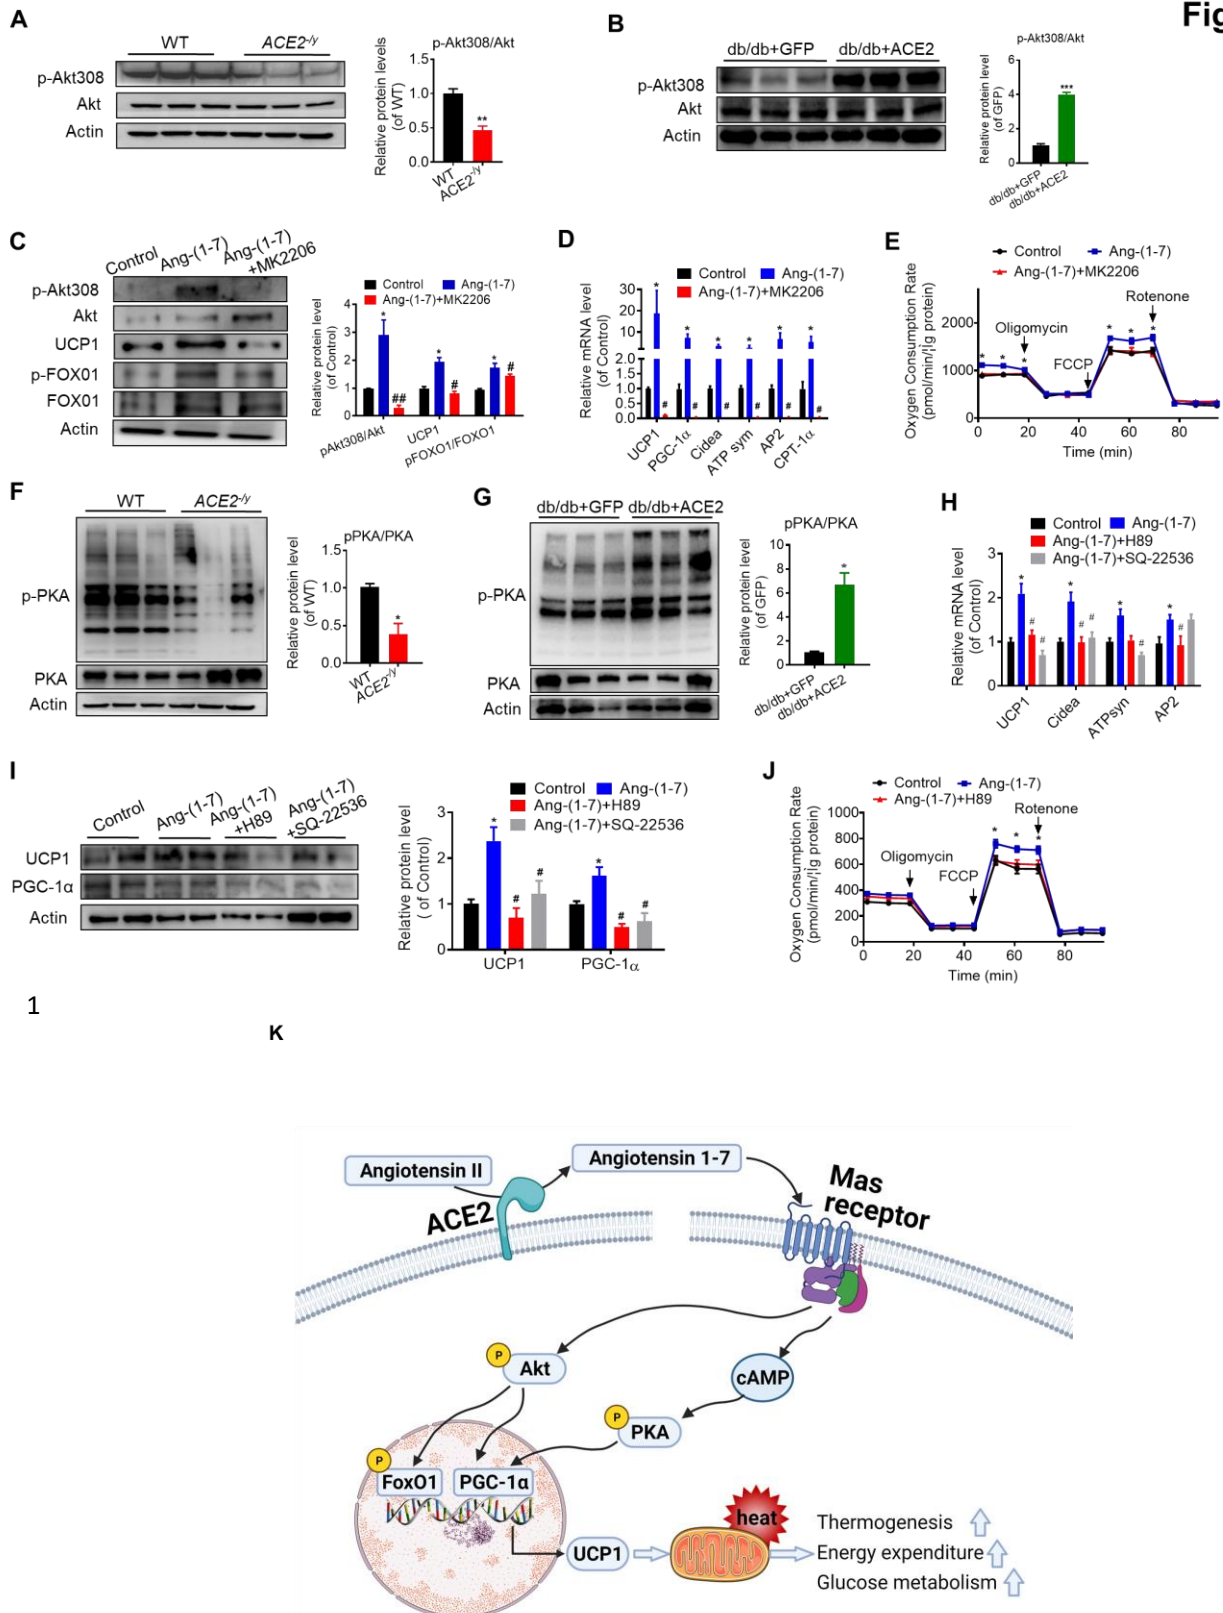

1

K

2

3 **Figure 6. ACE2 pathway induces a thermogenesis program through the Akt**  
4 **signaling and the PKA signaling**

5 Primary brown adipocytes were isolated, cultured, and treated with Ang-(1-7) (10<sup>-6</sup>M) for  
6 24 hours, Akt inhibitor MK2206 (30μM) for 24 hours, PKA inhibitor H89 (30μM) for 2  
7 hours, or adenylylcyclase inhibitor SQ-22536 (10μM) for 24 hours.

- 1 **(A, B)** Representative western blots showing the changes of p-Akt308 and Akt in BAT of  
2 *ACE2<sup>-/-</sup>* **(A)** and db/db+ACE2 mice **(B)** exposure at 4°C. n =3/each group.
- 3 **(C)** Representative western blots showing the Akt, uncoupling protein-1 (UCP1) and  
4 forkhead box protein O1 (FOXO1) changes. n=3/each group.
- 5 **(D)** Relative mRNA levels of thermogenic and mitochondrial genes. n=4-6/each group.
- 6 **(E)** Continuous measurement of oxygen consumption rate (OCR). Oxygen consumption  
7 was performed under basal conditions, following the addition of oligomycin (14μM), the  
8 pharmacological uncoupler FCCP (10μM) or the Complex III and I inhibitor antimycin A  
9 and rotenone (4μM each). n =5-7/each group.
- 10 **(F, G)** Representative western blots showing the p-PKA and PKA changes in BAT of  
11 *ACE2<sup>-/-</sup>* **(F)** and db/db+ACE2 mice **(G)** exposure at 4°C. n =3/each group.
- 12 **(H)** Relative mRNA levels of thermogenic and mitochondrial genes. n=4-6/each group.
- 13 **(I)** Representative western blots showing the UCP1 and PGC-1α changes. n=4/each  
14 group.
- 15 **(J)** Continuous measurement of OCR. Oxygen consumption was performed under basal  
16 conditions, following the addition of oligomycin, the pharmacological uncoupler FCCP  
17 (10μM) or the Complex III and I inhibitor antimycin A and rotenone (4μM each). n  
18 =5-7/each group.
- 19 Data represent mean ± SEM; \**p* < 0.05, \*\**p* < 0.01 vs control group by Student's test. # *p*  
20 < 0.05, ## *p* < 0.01 vs Ang-(1-7) group by Student's *t*-test.
- 21 **(K)** Mechanisms involved in ACE2 pathway activation-induced improvement of BAT  
22 function.
- 23 The online version of this article includes the following figure supplement(s) for figure 6:  
24 **Figure supplement 5.** RNA-Seq analysis of primary brown adipocytes from *ACE2<sup>-/-</sup>* and  
25 WT mice; Ang-(1-7) regulates thermogenesis through Akt and PKA signaling in BAT.
- 26 **Figure supplement 6.** Ang-(1-7) regulates thermogenesis through Akt and PKA  
27 signaling in BAT.

## 1 Supplementary Figures

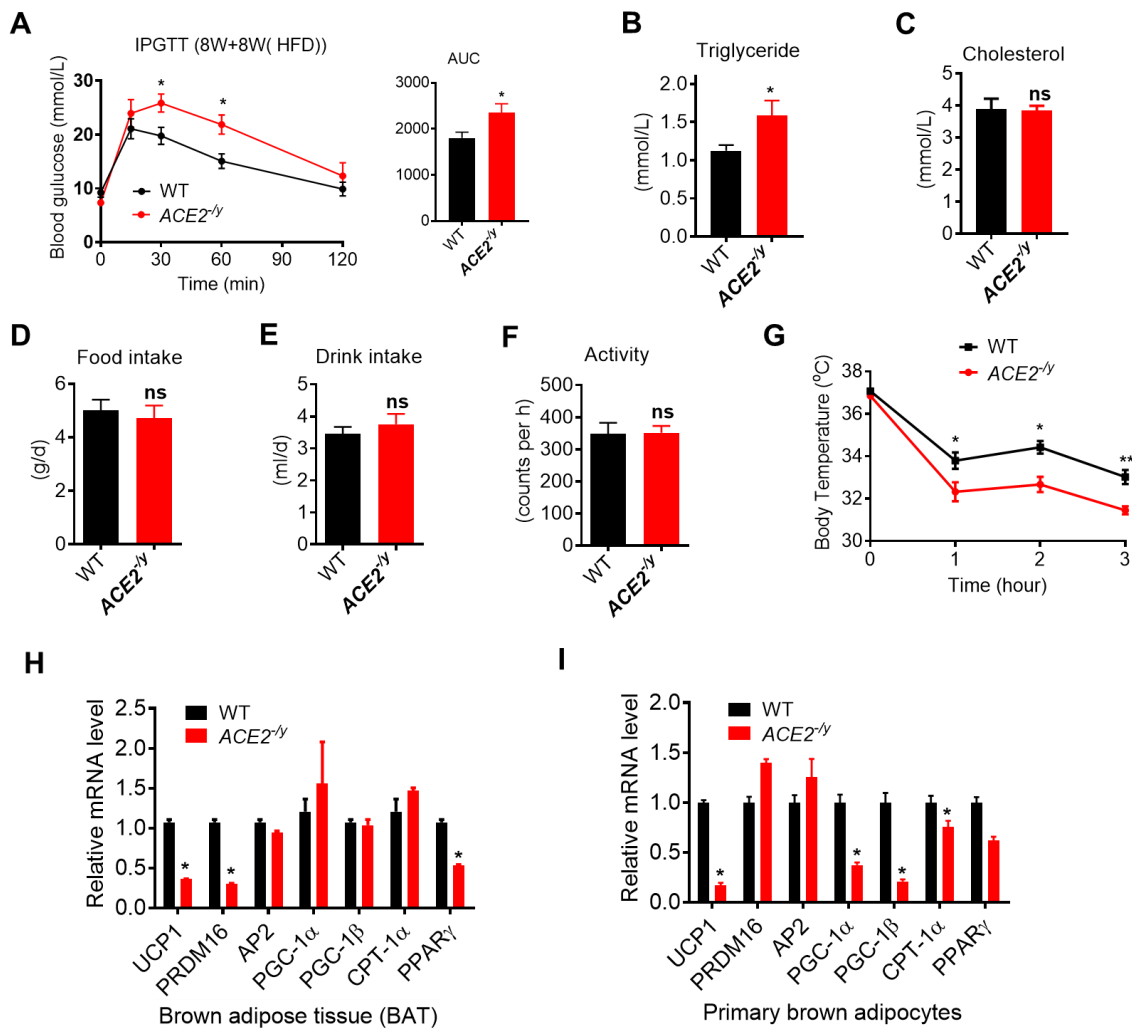

2

3 **Figure supplement 1.** ACE2 deficiency impairs adaptive thermogenesis by cold  
4 stimulation.

5 Eight-week-old male  $ACE2^{-/-}$  mice and their WT (control) mice had an HFD for 8 weeks  
6 ( $ACE2^{-/-}$  vs WT).

7 (A-C) Intraperitoneal glucose tolerance test (IPGTT), serum triglyceride and  
8 cholesterol levels in  $ACE2^{-/-}$  and WT mice.

9 (D-F) 24 h food intake, water intake and physical activity were measured in  $ACE2^{-/-}$  and  
10 WT mice.

11 (G) Core body temperature at 4 $^{\circ}$ C for the indicated lengths of time in  $ACE2^{-/-}$  and WT  
12 mice.

13 (H) Relative mRNA levels of mitochondrial related genes, fatty acid oxidation related  
14 genes and transcription factors in BAT of in  $ACE2^{-/-}$  and WT mice exposure at 4 $^{\circ}$ C.

15 (I) Relative mRNA levels of mitochondrial related genes, fatty acid oxidation related  
16 genes and transcription factors in primary brown adipocytes from  $ACE2^{-/-}$  and WT mice.  
17 n=5-7/each group; Data represent mean  $\pm$  SEM; \* $p$  < 0.05, \*\* $p$  < 0.01 vs WT group by  
18 Student's test.

19

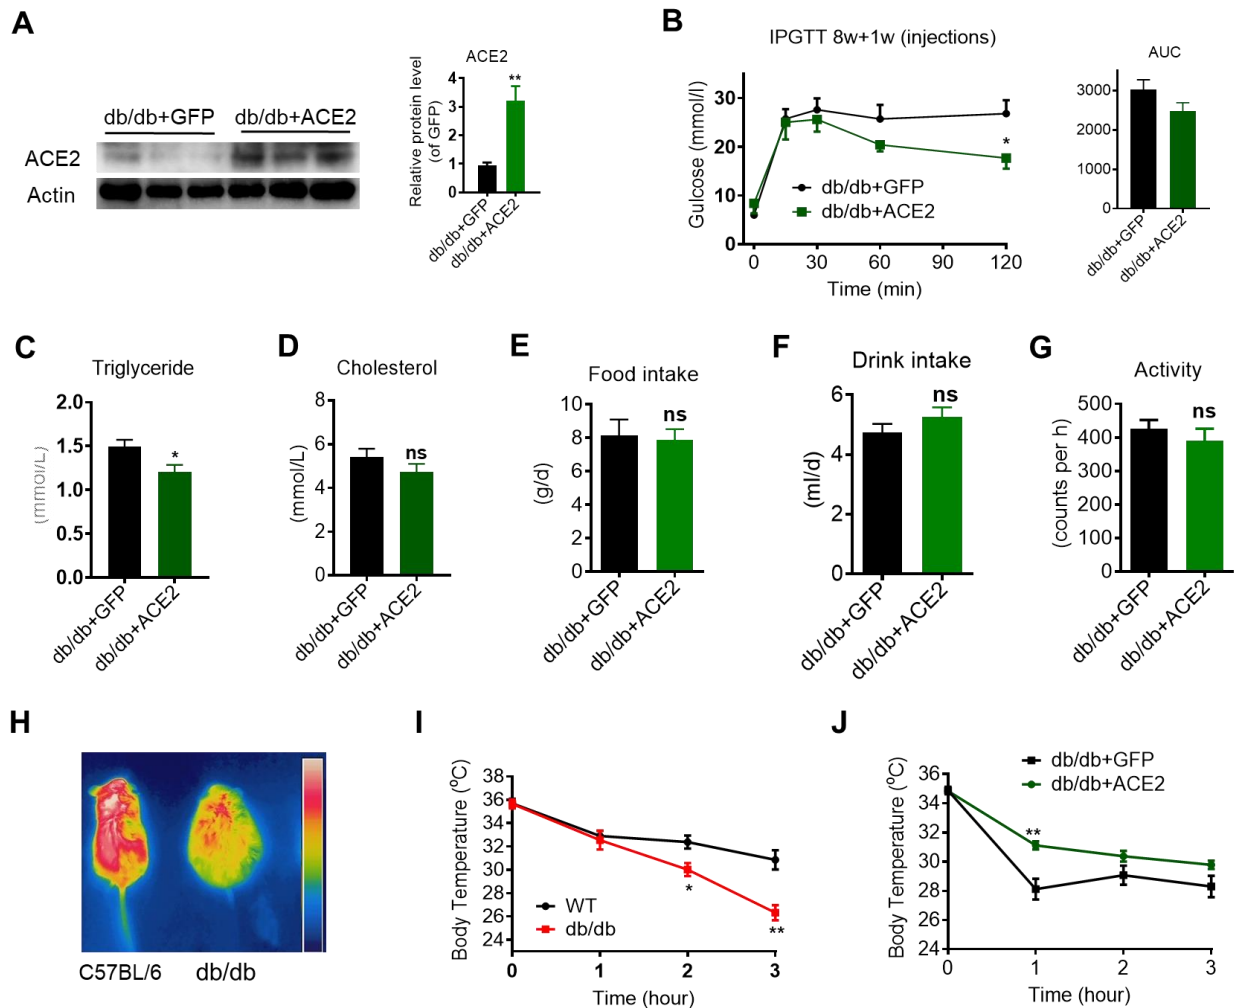

1

2 **Figure supplement 2. ACE2 enhance BAT activity and whole-body energy metabolism**  
 3 in db/db mice.

4 The ad-ACE2 and Ad-GFP treated db/db mice were used at the 6th day post-virus  
 5 injection (db/db+ACE2 vs db/db+GFP).

6 (A) ACE2 overexpression was verified in BAT of Ad-ACE2-treated db/db mice by  
 7 Western blotting.

8 (B-D) Intraperitoneal glucose tolerance test (IPGTT), serum triglyceride and  
 9 cholesterol levels in db/db+ACE2 and db/db+GFP mice.

10 (E-G) 24 h food intake, water intake and physical activity were measured in db/db+ACE2  
 11 and db/db+GFP mice.

12 (H, I) Infrared thermal images at 22°C and core body temperature at 4°C for the indicated  
 13 lengths of time in C57BL/6 and db/db mice. (J) Core body temperature at 4°C for the  
 14 indicated lengths of time in db/db+ACE2 and db/db+GFP mice. n=5-7/each group; Data  
 15 represent mean ± SEM; \**p* < 0.05, \*\**p* < 0.01 vs WT/GFP group by Student's test.

16

17

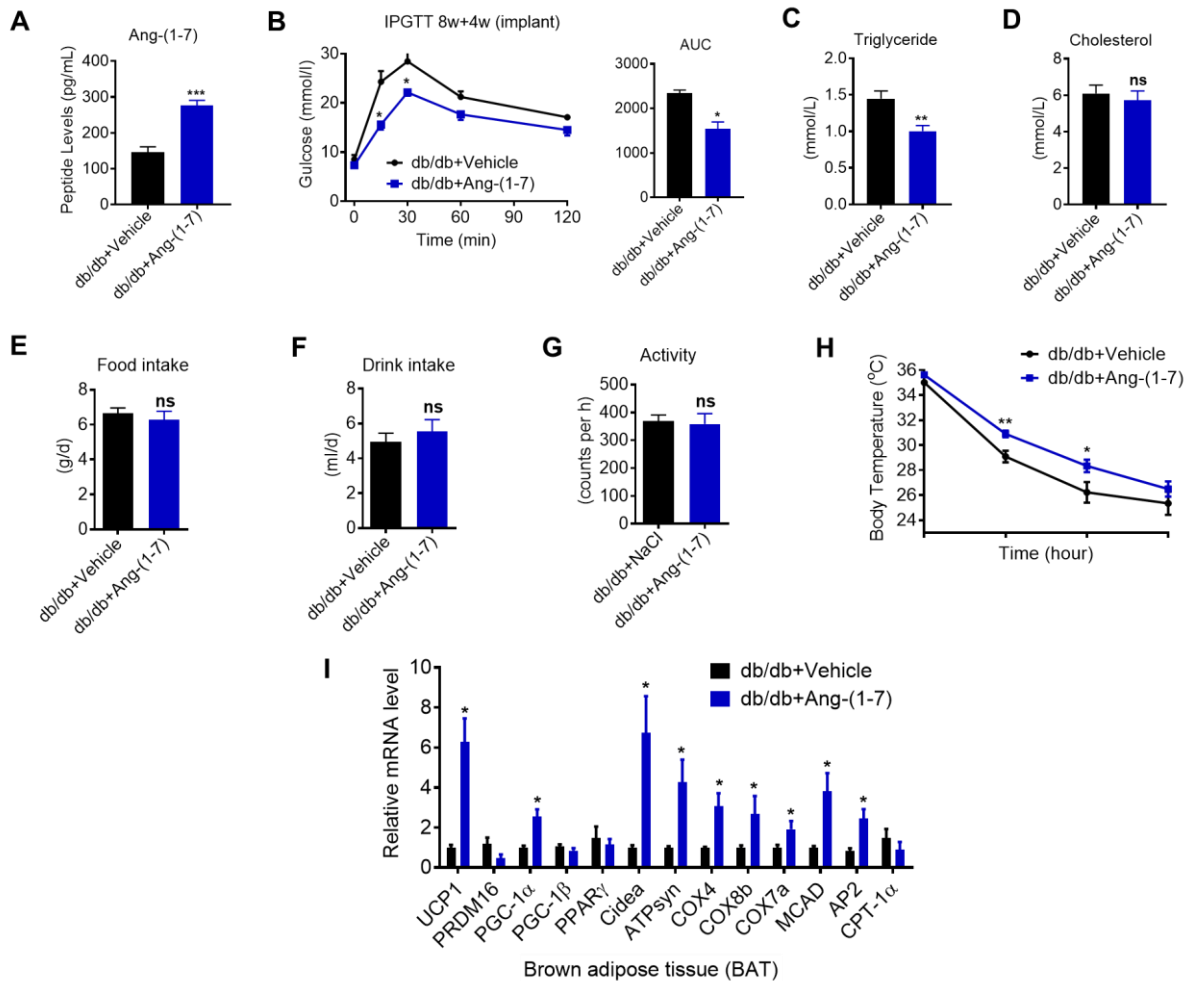

1

2 **Figure supplement 3. Ang-(1-7) promoted thermogenesis and energetic metabolism in**  
 3 **BAT of db/db mice during cold challenge.**

4 db/db mice were treated with Ang-(1-7) by subcutaneous infusion of Ang-(1-7) or saline  
 5 using osmotic mini-pumps for 4 weeks (db/db+Ang-(1-7) vs db/db+Vehicle).

6 **(A)** Serum levels of Ang-(1-7) as determined by ELISA in db/db+Ang-(1-7) and  
 7 db/db+Vehicle mice.

8 **(B-D)** Intraperitoneal glucose tolerance test (IPGTT), serum triglyceride and  
 9 cholesterol levels in db/db+Ang-(1-7) and db/db+Vehicle mice.

10 **(E-G)** 24 h food intake, water intake and physical activity were measured in  
 11 db/db+Ang-(1-7) and db/db+Vehicle mice.

12 **(H)** Core body temperature at 4°C for the indicated lengths of time in db/db+Ang-(1-7)  
 13 and db/db+Vehicle mice.

14 **(I)** Relative mRNA levels of mitochondrial related genes, fatty acid oxidation related  
 15 genes and transcription factors in BAT of in db/db+Ang-(1-7) and db/db+Vehicle mice  
 16 exposure at 4°C. n=5-7/each group; Data represent mean  $\pm$  SEM; \* $p$  < 0.05, \*\* $p$  < 0.01 vs  
 17 Vehicle group by Student's test.

18

19



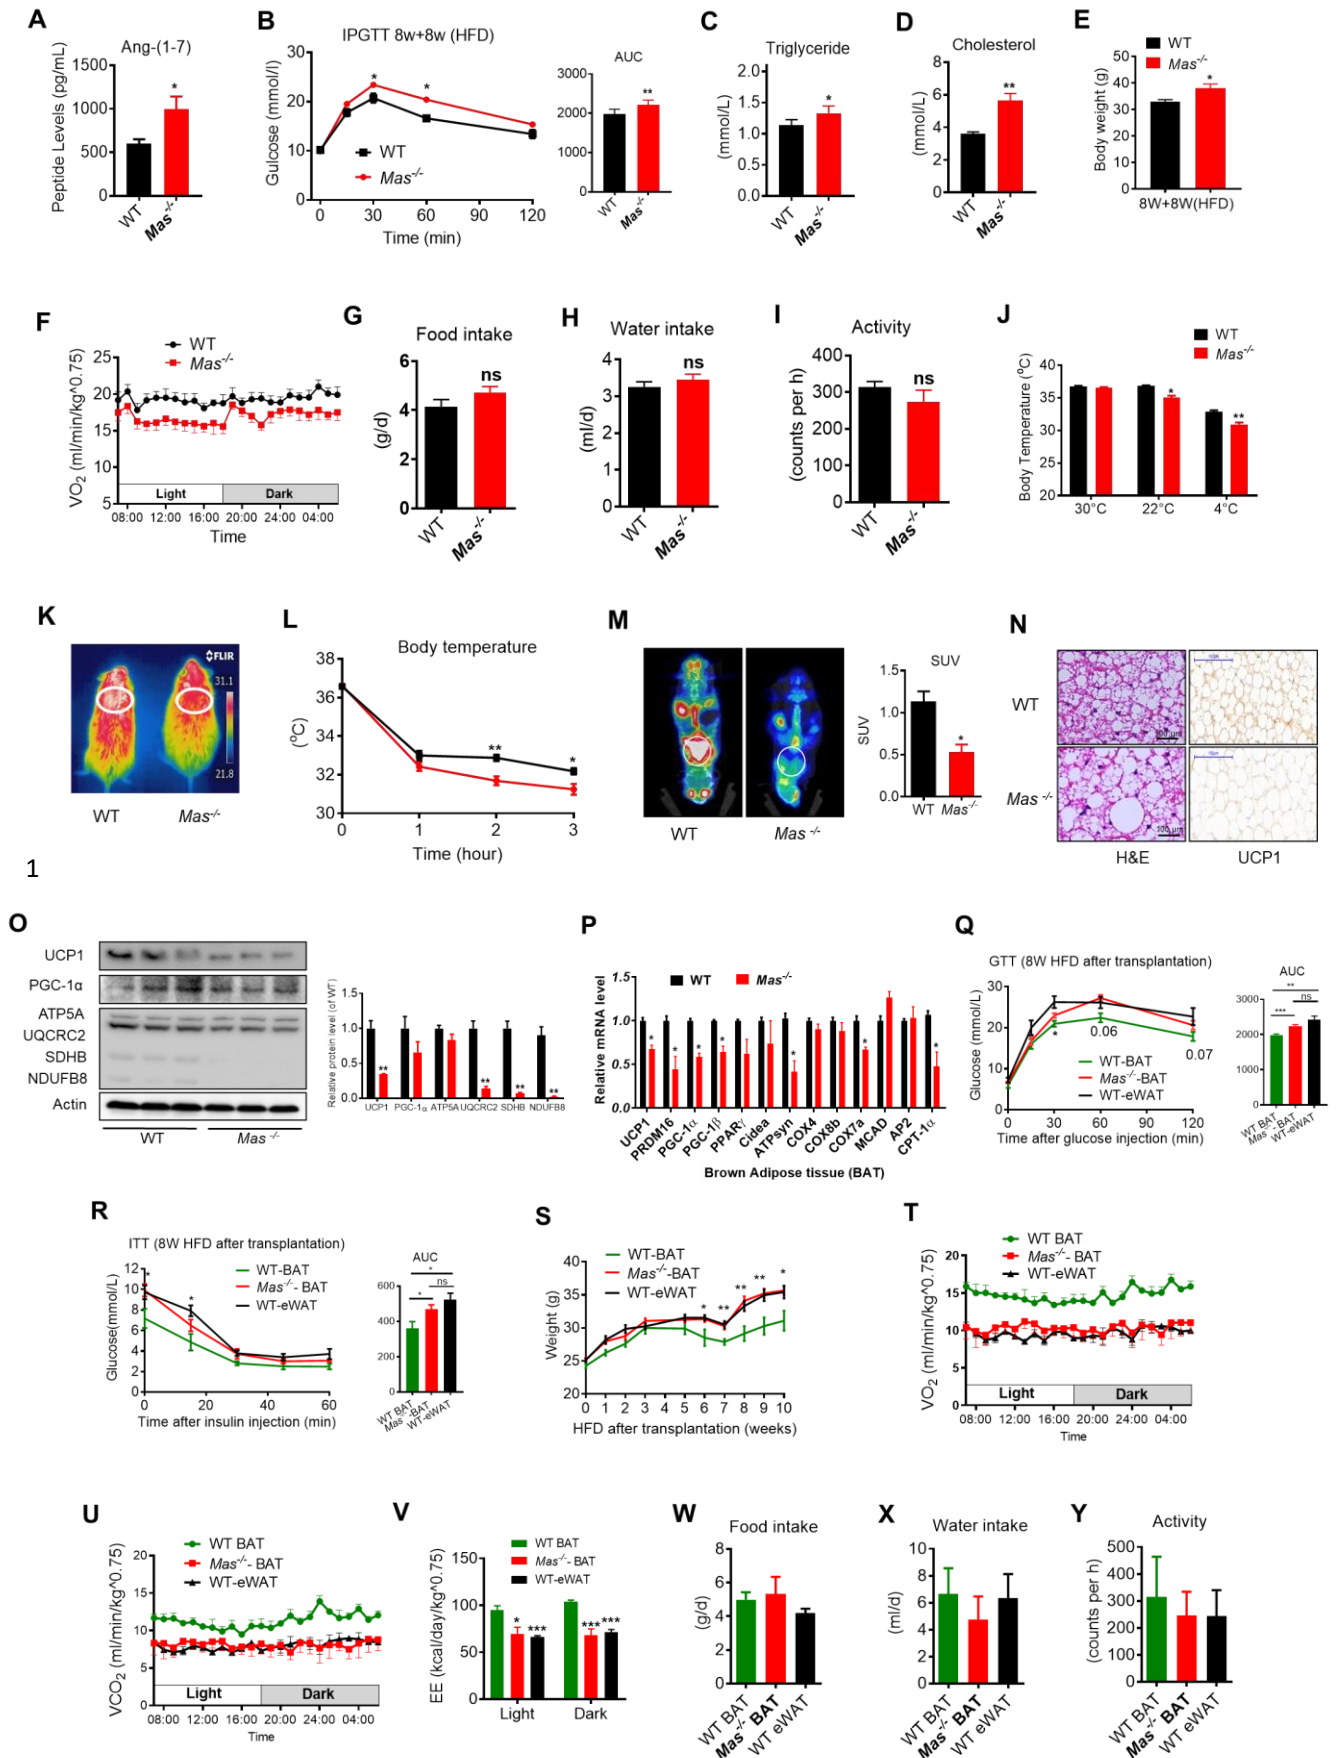

1

2

1 **Figure supplement 4.** Ablation of Mas impairs thermogenesis, BAT activity, and  
2 energetic metabolism.  
3 **(A-P)** Eight-week-old male *Mas*<sup>-/-</sup> mice and their WT (control) mice had a high-fat diet  
4 (HFD) for 8 weeks (*Mas*<sup>-/-</sup> vs WT). **(Q-Y)** BAT of C57B/L6 recipient mice was removed  
5 from the interscapular region. Then, the BAT dissected from *Mas*<sup>-/-</sup> donor mice, was  
6 subcutaneously transplanted into the dorsal interscapular region of C57B/L6 recipient  
7 mice (WT+*Mas*<sup>-/-</sup>-BAT). C57B/L6 recipient mice transplanted with C57B/L6 BAT  
8 (WT+WT-BAT) and C57B/L6 epididymal white adipose tissue (eWAT) (WT+WT-eWAT)  
9 were used as control. The recipient mice were then fed an HFD immediately after the  
10 transplantation and continued for 10 weeks (WT+*Mas*<sup>-/-</sup>-BAT vs WT+WT-BAT,  
11 WT+WT-eWAT).  
12 **(A)** Serum levels of Ang-(1-7) as determined by ELISA in *Mas*<sup>-/-</sup> and WT mice.  
13 **(B-D)** Intraperitoneal glucose tolerance test (IPGTT), serum triglyceride and  
14 cholesterol levels in *Mas*<sup>-/-</sup> and WT mice.  
15 **(E)** Body weight in *Mas*<sup>-/-</sup> and WT mice fed an HFD for 8 weeks.  
16 **(F)** Energy expenditure was evaluated by measurement of oxygen consumption (VO<sub>2</sub>)  
17 over a 24h period in *Mas*<sup>-/-</sup> and WT mice.  
18 **(G-I)** 24 h food intake, water intake and physical activity were measured in *Mas*<sup>-/-</sup> and WT  
19 mice.  
20 **(J)** Core body temperature at 30°C, 22°C and 4°C for 8 hours in *Mas*<sup>-/-</sup> and WT mice.  
21 **(K)** Infrared thermal images at 22°C in *Mas*<sup>-/-</sup> and WT mice.  
22 **(L)** Core body temperature at 4°C for the indicated lengths of time in *Mas*<sup>-/-</sup> and WT mice.  
23 **(M)** Representative PET-CT image and SUVs of *Mas*<sup>-/-</sup> and WT mice.  
24 **(N)** Representative H&E staining and UCP1 immunostaining from BAT sections of *Mas*<sup>-/-</sup>  
25 and WT mice exposure at 4°C.  
26 **(O)** Representative western blots showing the changes of key proteins in BAT of *Mas*<sup>-/-</sup>  
27 and WT mice exposure at 4°C.  
28 **(P)** Relative mRNA levels of mitochondrial related genes, fatty acid oxidation related  
29 genes and transcription factors in BAT of in *Mas*<sup>-/-</sup> and WT mice exposure at 4°C.  
30 **(Q)** Intraperitoneal glucose tolerance test (GTT) and the average area under the curve  
31 (AUC) in WT+*Mas*<sup>-/-</sup>-BAT, WT+WT-BAT and WT+WT-eWAT mice fed an HFD for 8  
32 weeks after transplantation.  
33 **(R)** Insulin tolerance test (ITT) and AUC in WT+*Mas*<sup>-/-</sup>-BAT, WT+WT-BAT and  
34 WT+WT-eWAT mice fed an HFD for 8 weeks after transplantation.  
35 **(S)** Body weight time course in WT+*Mas*<sup>-/-</sup>-BAT, WT+WT-BAT and WT+WT-eWAT mice  
36 fed an HFD over 10 weeks after transplantation.  
37 **(T-V)** Energy expenditure was evaluated by measurement of oxygen consumption (VO<sub>2</sub>)  
38 **(T)**, of carbon dioxide release (VCO<sub>2</sub>) **(U)** and of energy expenditure (EE) **(V)** over a 24h  
39 period in WT+*Mas*<sup>-/-</sup>-BAT, WT+WT-BAT and WT+WT-eWAT mice.  
40 **(W-Y)** 24 h food intake, water intake and physical activity were measured in  
41 WT+*Mas*<sup>-/-</sup>-BAT, WT+WT-BAT and WT+WT-eWAT mice fed an HFD for 8 weeks after  
42 transplantation. n=5-7/each group; Data represent mean ± SEM; \**p* < 0.05, \*\**p* < 0.01 vs  
43 WT/ WT+WT-BAT group by Student's *t*-test.  
44  
45

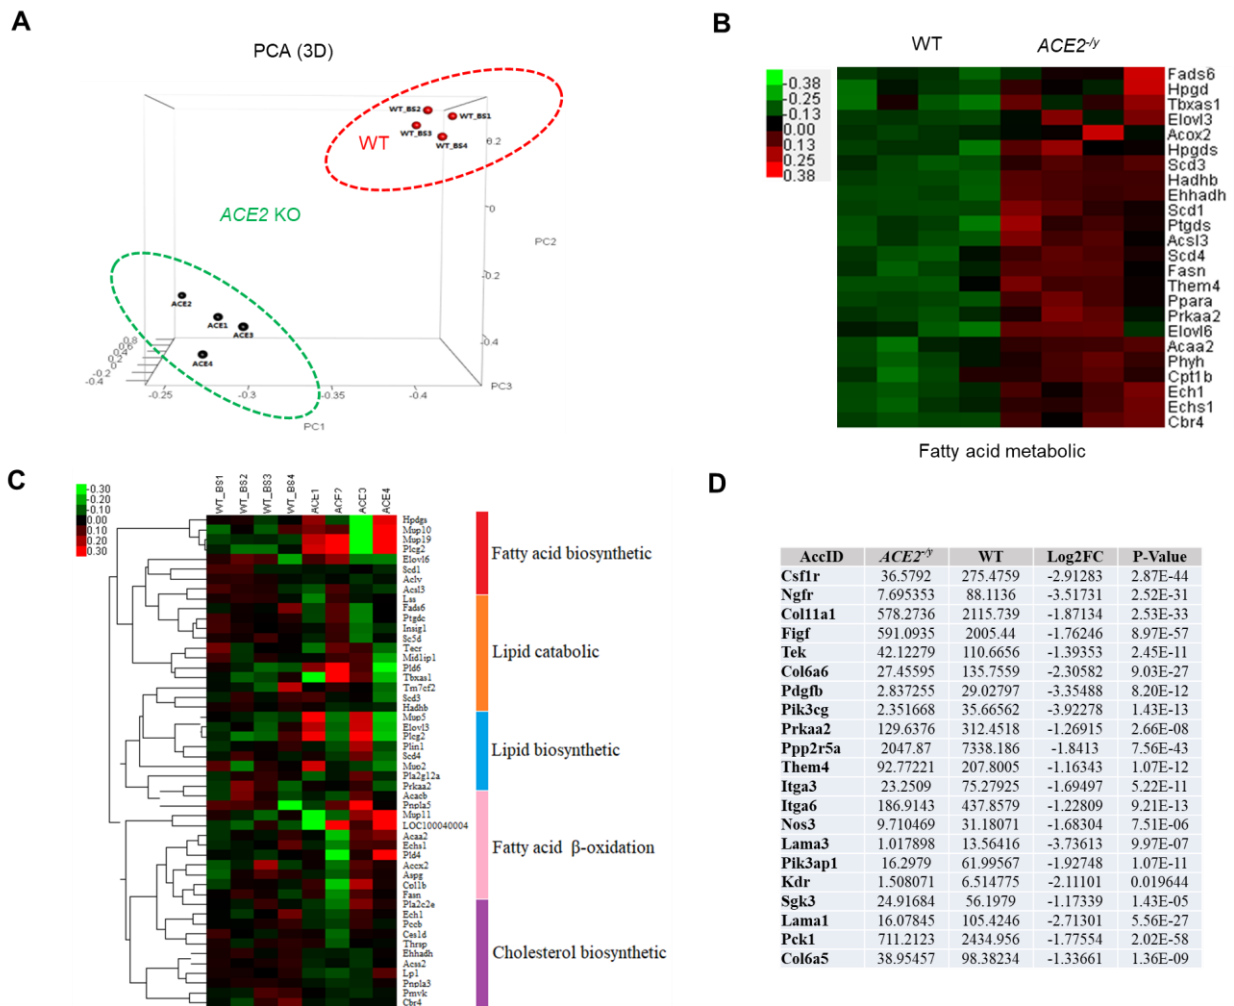

1  
2  
3  
4  
5  
6  
7  
8  
9  
10  
11  
12  
13  
14  
15

**Figure supplement 5.** RNA-Seq analysis of primary brown adipocytes from ACE2<sup>-/-</sup> and WT mice.

(A) 3D-PCA analysis represent the deviation of 4 replication within ACE2<sup>-/-</sup> (ACE2 1-4) and WT mice (WT\_BS 1-4).

(B) Heat map representation of the differentially expressed genes in ACE2<sup>-/-</sup> and WT mice. Gene expression is coded in color scale (-2 to 2). Red or green indicates expression levels above or below the median, respectively. The magnitude of deviation from the median is represented by color saturation.

(C) Heat map of selected genes associated with fatty acid biosynthetic, lipid catabolic, lipid biosynthetic, fatty acid beta-oxidation and cholesterol biosynthetic, which derived from GO analysis results.

(D) Table for the expression of Akt signal pathways related genes.

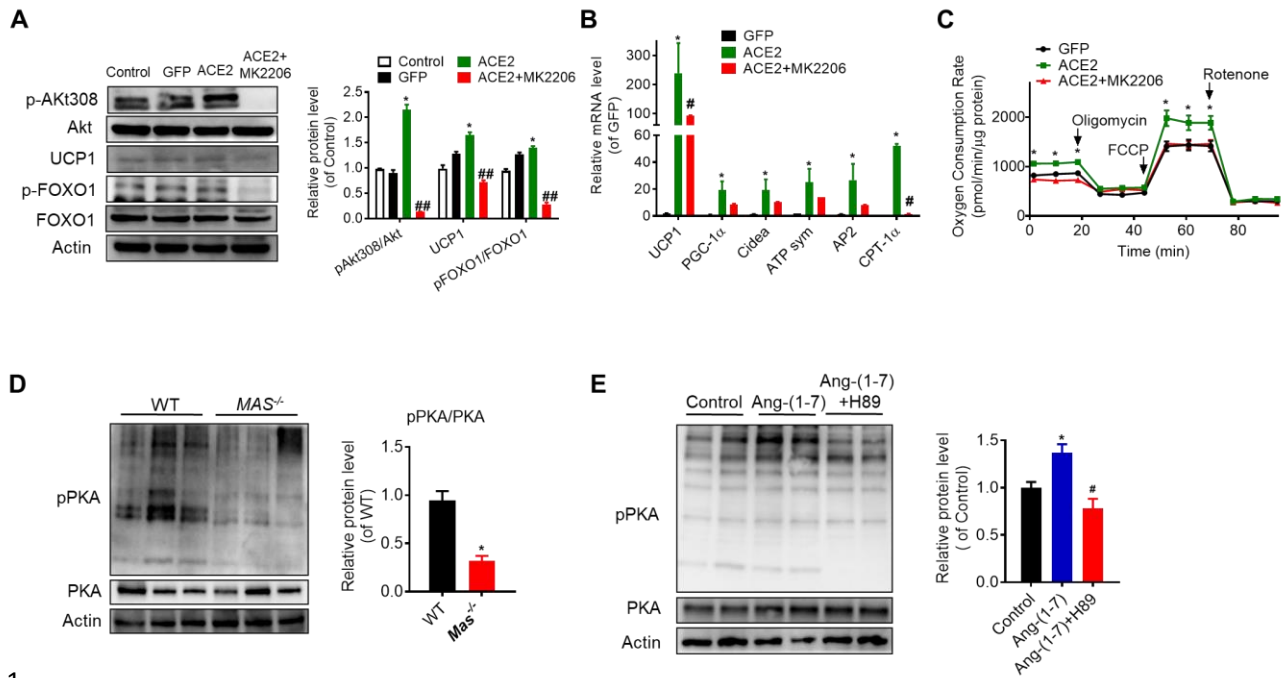

1

2 **Figure supplement 6.** Ang-(1-7) regulates thermogenesis through Akt and PKA  
3 signaling in BAT.

4 Primary brown adipocytes were isolated, cultured, infected with ACE2 adenovirus,  
5 treated with Ang-(1-7) ( $10^{-6}$ M) for 24 hours, Akt inhibitor MK2206 ( $30\mu\text{M}$ ) for 24 hours, or  
6 PKA inhibitor H89 ( $30\mu\text{M}$ ) for 2 hours.

7 (A) Representative western blots showing the Akt, UCP1 and FoxO1 changes in primary  
8 brown adipocytes overexpressing ACE2 at day 7 and treated with MK2206.  $n = 3/\text{each}$   
9 group.

10 (B) Relative mRNA levels of thermogenic and mitochondrial genes.  $n = 4-6/\text{each}$  group.

11 (C) Continuous measurement of OCR. Oxygen consumption was performed under basal  
12 conditions, following the addition of oligomycin ( $14\mu\text{M}$ ), the pharmacological uncoupler  
13 FCCP ( $10\mu\text{M}$ ) or the Complex III and I inhibitor antimycin A and rotenone ( $4\mu\text{M}$  each).  $n$   
14  $= 4-7/\text{each}$  group.

15 (D) Representative western blots showing the p-PKA and PKA changes in BAT of  $Mas^{-/-}$   
16 mice exposure at  $4^{\circ}\text{C}$ .  $n = 3/\text{each}$  group.

17 (E) Representative western blots showing the p-PKA and PKA changes in Ang-(1-7) and  
18 H89 treated primary brown adipocytes.  $n = 4/\text{each}$  group. Data represent mean  $\pm$  SEM; \* $p$   
19  $< 0.05$ , \*\* $p < 0.01$  vs GFP/WT/control group by Student's test. #  $p < 0.05$ , ##  $p < 0.01$  vs  
20 ACE2/Ang-(1-7) group by Student's  $t$ -test.
